1 **Contributions of the four essential entry glycoproteins to HSV-1 tropism and the selection**  
2 **of entry routes.**

3

4 Adam T. Hilterbrand<sup>a</sup>, Raecliffe E. Daly<sup>a,b</sup>, Ekaterina E. Heldwein<sup>a,b</sup>#

5

6 <sup>a</sup>Department of Molecular Biology and Microbiology, Tufts University School of Medicine,  
7 Boston, MA 02111

8 <sup>b</sup>Graduate Program in Cellular, Molecular, and Developmental Biology, Tufts University School  
9 of Medicine, Boston, MA 02111

10

11 Running Head: The use of pseudotypes for investigating HSV-1 entry

12

13 Keywords: Herpes simplex viruses, HSV-1, cell entry, endocytosis, inhibitors, pseudotypes

14

15 #Address correspondence to Ekaterina E. Heldwein, [katya.heldwein@tufts.edu](mailto:katya.heldwein@tufts.edu)

16

17 **Abstract**

18 Herpes Simplex viruses (HSV-1 and HSV-2) encode up to 16 envelope proteins, four of which  
19 are essential for entry. However, whether these four proteins alone are sufficient to dictate the  
20 broad cellular tropism of HSV-1 and the selection of different cell-type dependent entry routes is  
21 unknown. To begin addressing this, we previously pseudotyped VSV, lacking its native  
22 glycoprotein G, with only the four essential entry glycoproteins of HSV-1: gB, gH, gL, and gD.  
23 This novel VSV $\Delta$ G-BHLD pseudotype recapitulated several important features of HSV-1 entry:  
24 the requirement for gB, gH, gL, gD, a cellular receptor, and sensitivity to anti-gB and anti-gH/gL  
25 neutralizing antibodies. However, due to the use of a single cell type in that study, the tropism of  
26 the VSV $\Delta$ G-BHLD pseudotype was not investigated. Here, we show that the cellular tropism of  
27 the pseudotype is severely limited compared to wild-type HSV-1 and that its entry pathways  
28 differ from the native HSV-1 entry pathways. To test the hypothesis that other HSV-1 envelope  
29 proteins may contribute to HSV-1 tropism, we generated a derivative pseudotype containing the  
30 HSV-1 glycoprotein gC (VSV $\Delta$ G-BHLD-gC) and observed a gC-dependent increase in entry  
31 efficiency in two cell types. We propose that the pseudotyping platform developed here has the  
32 potential to uncover functional contributions of HSV-1 envelope proteins to entry in a gain-of-  
33 function manner.

34

35 **Importance**

36 Herpes simplex viruses (HSV-1 and HSV-2) contain up to 16 different proteins in their  
37 envelopes. Four of these, glycoproteins gB, gD, gH, and gL, are termed essential with regard to  
38 entry whereas the rest are typically referred to as non-essential based on the entry phenotypes of  
39 the respective single genetic deletions. However, the single-gene deletion approach, which relies

40 on robust loss-of-function phenotypes, may be confounded by functional redundancies among  
41 the many HSV-1 envelope proteins. We have developed a pseudotyping platform, in which the  
42 essential four entry glycoproteins are isolated from the rest, which can be added back  
43 individually for systematic gain-of-function entry experiments. Here, we show the utility of this  
44 platform for dissecting the contributions of HSV envelope proteins, both the essential four and  
45 the remaining dozen (using gC as an example), to HSV entry.

46

## 47 **Introduction**

48 Herpes simplex viruses (HSV-1 and HSV-2) are enveloped viruses that infect much of the  
49 world's population for life and cause diseases ranging from painful oral or genital lesions to  
50 serious conditions such as encephalitis and blindness (1, 2). These viruses enter target cells by  
51 different, cell-type specific routes. For example, they enter neurons by direct fusion of their  
52 envelopes with the plasma membrane (3) and epithelial cells by endocytosis followed by fusion  
53 with an endosomal membrane (4, 5). While these entry pathways have been broadly described,  
54 the underlying mechanisms and the contributions of individual viral and cellular proteins to the  
55 selection of these entry routes remain incomplete.

56 HSV-1 entry by any route requires the coordinated efforts of four glycoproteins – gB, gH,  
57 gL, and gD, which are essential for entry (6-8) – and a cellular gD receptor (3, 9, 10). gB, gH,  
58 gL, and gD are also sufficient for cell-cell fusion of uninfected receptor-bearing cells expressing  
59 these four glycoproteins (11, 12). The prevalent model, which was largely developed through  
60 studies using the cell-cell fusion system, posits that these four viral glycoproteins orchestrate  
61 membrane fusion through a sequential activation process termed a cascade (13, 14). First, gD  
62 binds one of its three cellular receptors, nectin-1, herpesvirus entry mediator (HVEM), or 3-O-

63 sulfated heparan sulfate (3-OS-HS) (15). Binding of gD to its receptor triggers a conformational  
64 change within gD (14, 16, 17) that enables it to bind (18) and activate the gH/gL heterodimer  
65 (13, 19, 20). In turn, gH/gL presumably interacts with and activates gB (13, 21, 22), the fusogen  
66 that mediates the merger of the HSV lipid envelope with the cellular membrane (9, 10, 14, 23).

67 In addition to the essential four glycoproteins, HSV-1 encodes up to 12 more envelope  
68 proteins, eight glycosylated and four unglycosylated (24-26). Current models of HSV-1 entry do  
69 not account for the potential effects of these envelope proteins. Therefore, being able to  
70 functionally uncouple the four essential glycoproteins – gB, gH, gL, and gD – from the rest is  
71 fundamental for elucidating their contributions to HSV-1 cellular tropism and entry pathways.

72 One powerful system that enables such studies is the vesicular stomatitis virus (VSV)-  
73 based pseudotype, in which the native VSV glycoprotein, G, is replaced with a viral envelope  
74 protein of interest (27). The VSV pseudotyping system allows one to define entry mechanisms  
75 conferred by a specific viral glycoprotein by effectively isolating it from its native viral context.  
76 This platform has been used to elucidate the entry mechanisms of many viruses, notably those  
77 that require BSL-3 or BSL-4 containment facilities, including SARS-CoV (28, 29), SARS-CoV-  
78 2 (30), Ebola virus (31), Lassa virus (32, 33), Lujo virus (34), Hantavirus (35), Rift Valley fever  
79 virus (36), or those that are difficult to culture, such as Hepatitis C virus (37) or Japanese  
80 encephalitis virus (38). The use of VSV pseudotypes has been particularly useful in identifying  
81 cellular receptors of many viruses (31-36).

82 To determine whether the essential four HSV-1 glycoproteins were sufficient for entry,  
83 we previously generated VSV lacking its native glycoprotein G and pseudotyped with HSV-1  
84 gB, gH, gL, and gD through *trans*-complementation (VSV $\Delta$ G-BHLD) (39). The VSV $\Delta$ G-BHLD  
85 pseudotype efficiently entered C10 cells (B78 murine melanoma cells expressing HSV-1



86 receptor nectin-1), and its entry – like that of HSV-1 – required gB, gH, gL, gD, and a gD  
87 receptor, and was inhibited by anti-gB and anti-gH/gL neutralizing antibodies (39). However,  
88 this study left unknown whether the VSVΔG-BHLD pseudotype could enter any HSV-1  
89 susceptible cell types or utilize native entry routes. Therefore, we sought to directly compare the  
90 cellular tropism and the entry pathways of the VSVΔG-BHLD pseudotype and HSV-1 to  
91 determine the extent by which these were conferred solely by the four essential glycoproteins.

92 Here, we expanded our studies to six additional HSV-1 susceptible cell lines. VSVΔG-  
93 BHLD was only able to enter, with reasonable efficiency, two out of the seven HSV-1-  
94 susceptible cell lines. Additionally, the VSVΔG-BHLD pseudotype entered both cell lines by  
95 routes different from those used by HSV-1. Differences in tropism and routes of entry could not  
96 be accounted for by either cell-surface receptor levels, their nature (nectin-1 vs. HVEM), the  
97 relative amounts of gB, gH, gL, and gD, or virion morphology (VSV vs. HSV-1). Therefore, we  
98 conclude that the four essential HSV-1 entry glycoproteins are insufficient for entry into any  
99 HSV-1-susceptible cell and do not specify native entry routes. Our results raise an intriguing  
100 possibility that HSV-1-specific components outside the essential four glycoproteins influence  
101 HSV-1 entry. Indeed, when the HSV-1 glycoprotein gC was included in the VSVΔG-BHLD  
102 pseudotype (VSVΔG-BHLD-gC), entry efficiency into CHO-HVEM and HaCaT cells increased,  
103 suggesting a cell-type dependent gain-of-function conferred by gC. Therefore, we hypothesize  
104 that the so-called non-essential HSV-1 envelope proteins, which are missing from the VSVΔG-  
105 BHLD pseudotype, are important in specifying both HSV-1 tropism and its routes of cell entry.

106

107 **Results**

108 ***VSVΔG-BHLD pseudotypes enter a limited repertoire of HSV-1 susceptible cells.*** To determine  
109 the tropism of the VSVΔG-BHLD pseudotype, we selected seven HSV-1-susceptible cell lines  
110 (Fig. 1). The cell lines B78H1 and CHO-K1, which lack HSV-1 receptors served as negative  
111 controls. HSV-1 efficiently infected all seven receptor-bearing cells but not the receptor-negative  
112 cells (Fig. 1A). The VSVΔG-BHLD pseudotype efficiently infected C10 cells (Fig. 1B),  
113 consistent with our previous report (39). The VSVΔG-BHLD pseudotype also infected CHO-  
114 HVEM, CHO-nectin-1, and HaCaT cells, albeit with lower efficiency (Fig. 1B). Although  
115 VSVΔG-BHLD entry into CHO-HVEM and CHO-nectin-1 cells was relatively inefficient, it was  
116 clearly receptor-dependent (Fig. 1B). However, no measurable VSVΔG-BHLD entry was  
117 observed in HeLa, Vero, or SH-SY5Y cells (Fig. 1B) even at MOI of 10 (Fig. S1A).

118 Two additional VSV pseudotypes were used as controls. VSVΔG-G is VSVΔG  
119 pseudotyped *in trans* with native VSV glycoprotein G (39). VSVΔG-PIV5 is VSVΔG  
120 pseudotyped with entry glycoproteins HN and F from parainfluenza virus 5 (PIV5) (40). Both  
121 controls infected all 9 tested cell lines, with varying efficiency (Figs. S1B and C), suggesting the  
122 limited tropism of VSVΔG-BHLD could not be attributed to VSV morphology alone.

123

124 ***Cell-surface receptor levels do not correlate with differences in VSVΔG-BHLD cellular***  
125 ***tropism.*** We first asked whether differences in cell surface levels of HSV-1 receptors could  
126 account for VSVΔG-BHLD entry efficiency. Levels of HSV-1 gD receptors nectin-1 and HVEM  
127 vary across cell lines, and susceptibility to HSV-1 infection generally correlates with surface  
128 receptor levels (41). Surface levels of nectin-1 and HVEM were measured in all 9 cell lines by  
129 flow cytometry (Figs. 1C and D). As expected, neither receptor was detected on the receptor-

130 negative cell lines B78H1 and CHO-K1 (Figs. 1C and D). C10 and HaCaT cells had the highest  
131 levels of nectin-1, whereas intermediate levels of nectin-1 were detected on CHO-nectin-1,  
132 HeLa, Vero and SH-SY5Y cells (Fig. 1C). CHO-HVEM cells had high levels of HVEM but no  
133 detectable nectin-1 on their surface (Fig. 1D). In addition to nectin-1, we also detected HVEM on  
134 the surface of HaCaT and Vero cells (Fig. 1D), but the low amounts of HVEM suggested that  
135 nectin-1 likely functions as the primary receptor in these cells. Surprisingly, while both C10 and  
136 HaCaT cells expressed high levels of nectin-1, the VSV $\Delta$ G-BHLD pseudotype efficiently  
137 entered only C10 cells. These results suggest that surface receptor levels alone do not explain the  
138 varying entry efficiencies of the VSV $\Delta$ G-BHLD pseudotype into the tested cell lines.

139

140 ***Differences in tropism of VSV $\Delta$ G-BHLD and HSV-1 do not correlate with the relative***  
141 ***gB:gH:gL:gD ratios.*** HSV-1 and VSV acquire their envelopes from different sources: Trans  
142 Golgi Network (TGN) or endosomes for HSV-1 (42, 43) vs. the plasma membrane (PM) for  
143 VSV (27). Different envelope origins could affect the gB:gH:gL:gD ratios on viral particles and,  
144 possibly, influence entry efficiency. To test this hypothesis, purified HSV-1 and VSV $\Delta$ G-BHLD  
145 particles were analyzed for gB, gH, gL, and gD content by western blot (Fig. 1E), and relative  
146 gB:gH:gL:gD ratios were determined by densitometry. In each virus, levels of gH, gL, and gD  
147 were normalized to their respective gB levels. We found that the gB:gH:gL:gD ratios in HSV-1  
148 (1:0.47:0.05:1.36) and VSV $\Delta$ G-BHLD (1:0.57:0.12:1.31) virions were similar (Fig. 1F) and  
149 unlikely to account for the observed differences in tropism.

150

151 ***Entry of both VSV $\Delta$ G-BHLD and HSV-1 into C10 and CHO-HVEM cells occurs by***  
152 ***endocytosis.*** HSV-1 can enter different cell types by fusion at the plasma membrane (Vero and

153 SH-SY5Y) (5, 44) or by endocytosis (C10, CHO-nectin-1, CHO-HVEM, HeLa, and HaCaT) (3,  
154 5, 45, 46). To compare the entry routes of the VSV $\Delta$ G-BHLD pseudotype and HSV-1, we chose  
155 C10 and CHO-HVEM cells because the VSV $\Delta$ G-BHLD pseudotype infected C10 (~50%) or  
156 CHO-HVEM (~8%) cells to an appreciable extent and in a receptor-dependent manner (Fig. 1B).

157 We first treated cells with a hypertonic solution of sucrose, a broad inhibitor of endocytic  
158 pathways (47, 48). Entry of both HSV-1 and VSV $\Delta$ G-BHLD into C10 and CHO-HVEM cells  
159 was inhibited by sucrose (Fig. 2A-D), implicating endocytosis. As a control, sucrose also  
160 prevented the endocytic uptake of Alexa Fluor 488-labeled transferrin into both C10 and CHO-  
161 HVEM cells (Fig. S2E). As expected, sucrose did not inhibit entry of VSV $\Delta$ G-PIV5 into either  
162 cell line (Figs. S2B and D) because PIV5 enters by fusion at the plasma membrane (40, 49).

163 VSV entry occurs by endocytosis (50-52), and, accordingly, sucrose blocked entry of VSV $\Delta$ G-G  
164 into C10 cells (Fig. S2A). Surprisingly, it did not block entry into CHO-HVEM cells (Fig. S2C),  
165 suggesting that the inhibitory effect of hypertonic sucrose on VSV-G-dependent entry is cell-  
166 type specific.

167

168 ***VSV $\Delta$ G-BHLD entry requires dynamin but not clathrin whereas HSV-1 entry requires both.***

169 Having established that the VSV $\Delta$ G-BHLD pseudotype entered cells by endocytosis, we next  
170 sought to identify the entry routes and compare them to those of HSV-1 by using both chemical  
171 and genetic means of inhibiting various endocytic uptake pathways.

172 First, we examined the role of clathrin-mediated endocytosis (CME), one of the most  
173 well studied endocytic pathways hijacked by viruses for entry (53, 54). CME requires both  
174 clathrin, to promote receptor-mediated endocytosis (55), and dynamin, a GTPase that mediates  
175 scission of the endocytic vesicle (56). We chose three commonly used dynamin inhibitors:

176 Dynasore, Dyngo-4a, and myristyltrimethylammonium bromide (MiTMAB) (47, 57). For  
177 clathrin inhibition, we chose Pitstop-2, which selectively blocks CME by preventing ligand  
178 association with the clathrin terminal domain (47). Another CME inhibitor, chlorpromazine,  
179 which prevents clathrin association with the plasma membrane (47), was also tested but found to  
180 be toxic to both C10 and CHO-HVEM cells. Inhibitory activity of all four compounds was  
181 ascertained by their ability to inhibit CME of transferrin (Figs. S3E and F).

182 HSV-1 entry into both C10 and CHO-HVEM cell lines was inhibited by all four  
183 inhibitors (Figs. 3A and B) indicating that HSV-1 enters both cell lines by CME. Entry of the  
184 VSV $\Delta$ G-BHLD pseudotype into C10 and CHO-HVEM cells was sensitive to all dynamin  
185 inhibitors (Figs. 3C and D). However, Pitstop-2 did not block VSV $\Delta$ G-BHLD entry (Figs. 3C  
186 and D), suggesting that CME was not involved in entry. Collectively, these observations  
187 suggested that HSV-1 enters both C10 and CHO-HVEM cells by CME whereas VSV $\Delta$ G-BHLD  
188 pseudotypes utilize a dynamin-dependent, clathrin-independent entry route. These results were  
189 the first indication of possible differences in entry routes of HSV-1 and VSV $\Delta$ G-BHLD.

190 Entry of the control VSV $\Delta$ G-G pseudotype into C10 cells was blocked by all three  
191 dynamin inhibitors and the clathrin inhibitor (Fig. S3A), and its entry into CHO-HVEM cells  
192 was blocked by Pitstop-2 (Fig. S3C) and by two of three dynamin inhibitors, Dynasore and  
193 Dyngo-4a (Fig. S4C), strongly implicating CME as the entry route (52, 58). VSV $\Delta$ G-PIV5 entry  
194 into CHO-HVEM cells was not blocked by any of the four inhibitors (Fig. S3D) while its entry  
195 into C10 cells was blocked only by one out of three dynamin inhibitors, Dyngo-4a (Fig. S3C),  
196 consistent with the previous report of entry into other cell types by fusion at the plasma  
197 membrane (40, 49).

198

199 ***Cholesterol is important for entry of both VSVΔG-BHLD and HSV-1.*** Our results suggested  
200 that VSVΔG-BHLD did not use CME for entry into either C10 or CHO-HVEM cells,  
201 implicating a clathrin-independent endocytic (CIE) route. Caveolin-dependent endocytosis is a  
202 major CIE (59) that is hijacked by viruses such as SV40 or Japanese encephalitis virus (60, 61).  
203 Caveolin-1 is cellular protein that, similarly to clathrin, promotes membrane curvature and  
204 subsequent endocytosis through the formation of caveolae (62). Caveolin-dependent entry  
205 requires plasma membrane cholesterol for proper caveolin-1 association with the membrane (62,  
206 63).

207 Previous work has demonstrated that cellular cholesterol was important for HSV-1 entry  
208 into C10 cells (64). Similarly, entry of both HSV-1 and VSVΔG-BHLD into C10 and CHO-  
209 HVEM cells decreased when cholesterol was removed from cellular membranes using a  
210 cholesterol-depleting agent, methyl-β-cyclodextrin (MβCD) (Figs. 4A-D). Efficiency of  
211 cholesterol depletion was confirmed by the reduction of the cholesterol-dependent association of  
212 cholera toxin subunit B (CTB) (65) with C10 and CHO-HVEM cells upon MβCD treatment  
213 (Fig. S4E). Entry of VSVΔG-G was insensitive to cholesterol depletion (Figs. S4A and C), as  
214 reported for other cell types (66, 67). In the case of VSVΔG-PIV5, only entry into C10 cells was  
215 cholesterol-dependent (Fig. S4B) whereas the entry into CHO-HVEM cells was not (Fig. S4D),  
216 suggesting that cholesterol is required for VSVΔG-PIV5 entry in a cell-type dependent manner.

217 Entry of neither HSV-1 nor VSVΔG-BHLD into CHO-HVEM cells was reduced by the  
218 knockdown of caveolin-1 (Fig. 4E), similarly to the VSVΔG-G and VSVΔG-PIV5 control  
219 viruses (Fig. S4F). Successful knockdown was verified by western blot (Fig. 4F). Surprisingly,  
220 no caveolin-1 was detected in C10 cells (Fig. 4G). Caveolin-1 was detected in 3T12 cells

221 (murine fibroblasts), which ruled out species-dependent recognition of murine vs. hamster  
222 caveolin-1, (Fig. 4G). Therefore, C10 cells appear to express no detectable caveolin-1. We  
223 conclude that while cellular cholesterol is important for the entry of both HSV-1 and VSVΔG-  
224 BHLΔ, neither virus utilizes caveolin-1-mediated endocytosis for entry into C10 and CHO-  
225 HVEM cells.

226

227 ***HSV-1 and VSVΔG-BHLΔ do not enter C10 and CHO-HVEM cells by macropinocytosis, but***  
228 ***NHE1 and Rac1 are important for optimal VSVΔG-BHLΔ entry.*** We next evaluated the  
229 potential involvement of macropinocytosis, another CIE commonly used by viruses (68). We  
230 selected three known inhibitors of macropinocytosis: cytochalasin D (CytoD), 5-(N-Ethyl-N-  
231 isopropyl)amiloride (EIPA), and NSC23766 (47). CytoD is a potent inhibitor of actin  
232 polymerization that disrupts filamentous actin (47). EIPA blocks macropinocytosis by blocking  
233 Na<sup>+</sup>/H<sup>+</sup> exchange proteins (NHE), which decreases the intracellular pH and inhibits small  
234 GTPase function important for macropinocytosis (69). NSC23766 blocks macropinocytosis by  
235 inhibiting the activity of the small GTPase Rac1 (70). Inhibitory activity of all three compounds  
236 was confirmed by their ability to inhibit macropinocytosis of rhodamine-B-labeled 70-kDa  
237 dextran (Fig. S7E).

238 HSV-1 entry into either C10 or CHO-HVEM cells was not appreciably inhibited by any  
239 of the macropinocytosis inhibitors (Figs. 5A and C). By contrast, VSVΔG-BHLΔ entry into both  
240 C10 and CHO-HVEM cells was reduced by NSC23766 and, to a lesser extent, EIPA but not by  
241 cytochalasin D (Figs. 5B and D). While the inhibitory effect of NSC23766 and EIPA would  
242 appear to implicate macropinocytosis as the route of VSVΔG-BHLΔ entry into C10 and CHO-  
243 HVEM cells, the lack of actin involvement argues against it. This is because assembly of

244 filamentous actin is essential for the formation of membrane ruffles and subsequent uptake  
245 during macropinocytosis (71). Actin polymerization is, thus, a major hallmark of  
246 macropinocytosis (68). Accordingly, we did not observe any appreciable co-localization of  
247 VSV $\Delta$ G-BHLD virions with the 70-kDa rhodamine B labeled dextran, a fluid phase uptake  
248 marker (Figs. S5 and S6). Collectively, these results suggest that neither VSV $\Delta$ G-BHLD nor  
249 HSV-1 utilize macropinocytosis for entry into C10 or CHO-HVEM cells. However, NHE and  
250 Rac1 facilitate VSV $\Delta$ G-BHLD entry into both cell lines, presumably, independently of their role  
251 in macropinocytosis.

252         Although VSV enters cells by CME rather than macropinocytosis, it has been shown to  
253 require filamentous actin to achieve full engulfment of the viral particle by the plasma membrane  
254 during endocytosis, as observed in BSC-1 cells, an African green monkey epithelial cell line (58,  
255 72). Indeed, VSV $\Delta$ G-G entry into C10 cells was modestly reduced by cytochalasin D and EIPA  
256 but not NSC23766 (Fig. S7A) whereas its entry into CHO-HVEM cells was somewhat reduced  
257 by EIPA but not cytochalasin D or NSC23766 (Fig. S7C). The apparent lack of actin  
258 involvement in VSV $\Delta$ G-G entry into CHO-HVEM cells may represent a cell-type specific  
259 phenomenon. VSV $\Delta$ G-PIV5 entry was not blocked with any of the three inhibitors of  
260 macropinocytosis, consistent with fusion at the plasma membrane, and was, in fact, increased in  
261 the presence of EIPA in C10 cells (Fig. S7B).

262

263 ***HSV-1 and VSV $\Delta$ G-BHLD differ in their requirements for Rab GTPases for entry.*** Endocytic  
264 entry by many viruses requires small GTPases known as Rabs. Rab GTPases are important for  
265 the formation of endosomal compartments in the cell (73). Different viruses penetrate endocytic  
266 membranes at distinct endosomal maturation stages – for example, VSV fuses with membranes



267 of early endosomes whereas influenza A virus fuses with membranes of late endosomes (74) –  
268 so, proper formation of these endosomal compartments is essential for viral entry. GTPases Rab5  
269 and Rab7 are important for the maturation and formation of early endosomes and late  
270 endosomes/multi-vesicular bodies (MVBs), respectively (75). Overexpression of dominant  
271 negative (DN) forms of either Rab5 (Rab5DN) or Rab7 (Rab7DN) suppress early and late  
272 endosome formation, respectively (76, 77).

273 To identify the endosomal compartment(s) required for HSV-1 or VSVΔG-BHLD entry,  
274 C10 and CHO-HVEM cells were transfected with constructs encoding fluorescently tagged  
275 Rab5DN or Rab7DN and then infected. The transfection efficiency was 40-50% in C10 cells and  
276 30-40% in CHO-HVEM cells as measured by flow cytometry. To determine entry efficiency by  
277 flow cytometry, viral entry was calculated by dividing the percent of infected and transfected  
278 cells by the total number of transfected cells. Overexpression of either Rab5DN or Rab7DN had  
279 no significant effect on HSV-1 entry into either cell line (Figs. 6A and E). These results in C10  
280 and CHO-HVEM cells agree with recent work that indicates HSV-1 enters CHO-HVEM cells by  
281 a non-canonical endocytic route, independent of Rab5 or Rab7 (78). VSVΔG-BHLD entry into  
282 CHO-HVEM cells was also unaffected by either Rab5DN or Rab7DN (Fig. 6G). However,  
283 VSVΔG-BHLD entry into C10 cells was reduced in the presence of Rab5DN and, to some  
284 extent, Rab7DN (Fig. 6C). We hypothesize that HSV-1 entry into both cell lines and VSVΔG-  
285 BHLD entry into CHO-HVEM cells either do not depend on the endosomal maturation or occurs  
286 very early after internalization, prior to the formation of early endosomes. By contrast, VSVΔG-  
287 BHLD likely enters C10 cells out of early endosomes. This observation marked the first instance  
288 of a difference in VSVΔG-BHLD entry into C10 vs. CHO-HVEM cells.

289 As expected, entry of VSV $\Delta$ G-G into both C10 and CHO-HVEM cells was reduced in  
290 the presence of Rab5DN (Figs. S8A and E), in accordance with reports of VSV fusing with  
291 membranes of early endosomes (52). VSV $\Delta$ G-PIV5 entry into C10 cells was insensitive to  
292 Rab5DN or Rab7DN (Fig. S8C). Although VSV $\Delta$ G-PIV5 entry into CHO-HVEM cells was  
293 reduced by Rab5DN and Rab7DN in a statistically significant manner, the differences were  
294 relatively small (Fig. S8G). This suggested that Rab5DN and Rab7DN have a minimal effect on  
295 VSV $\Delta$ G-PIV5 entry as expected for a virus that fuses with the plasma membrane.

296 Another small GTPase, ADP-ribosylation factor 6 (Arf6), which is involved in regulating  
297 vesicular trafficking (79), regulates the endocytic entry of HIV, Coxsackievirus, and Vaccinia  
298 virus (80-82). To probe the role of Arf6 in entry, cells were treated with NAV-2729, which  
299 blocks Arf6 interaction with guanine exchange factors (GEFs) thereby preventing its activation  
300 (83). HSV-1 entry into both C10 and CHO-HVEM cells was inhibited by NAV-2729 (Figs. 6B  
301 and F) whereas VSV $\Delta$ G-BHLD entry was not (Figs. 6D and H), which suggests that only HSV-1  
302 entry requires Arf6 activity.

303 VSV $\Delta$ G-PIV5 entry was not inhibited by NAV-2729 in either C10 or CHO-HVEM cells  
304 (Figs. S8D and H). However, VSV $\Delta$ G-G entry was inhibited by NAV-2729 in both C10 and  
305 CHO-HVEM cells, suggesting that Arf6 could be involved in VSV endocytosis (Figs S8B and  
306 F). These results point to a previously unappreciated role of Arf6 in HSV-1 and VSV entry.

307

308 ***Entry of the VSV $\Delta$ G-BHLD pseudotype requires endosomal acidification in a cell-dependent***  
309 ***manner.*** To investigate the role of endosomal acidification in entry, we used three common  
310 inhibitors, NH<sub>4</sub>Cl, a weak base; monensin, a carboxylic ionophore; and bafilomycin A1 (BFLA),  
311 an endosomal V-ATPase inhibitor. Each inhibitor effectively blocked endosomal acidification as

312 evidenced by decrease in LysoTracker fluorescence in inhibitor-treated cells (Fig. S9E). Entry of  
313 VSVΔG-G, which requires low pH as a trigger for membrane fusion, was sensitive to all three  
314 inhibitors in both cell lines (Figs. S9A and C). By contrast, VSVΔG-PIV5 entry, which occurs by  
315 fusion at the plasma membrane, was insensitive to any of the inhibitors (Figs. S9B and D).

316 VSVΔG-BHLD entry into C10 cells was inhibited by all three endosomal acidification  
317 inhibitors (Fig. 7B) and thus appears to require endosomal acidification. VSVΔG-BHLD entry  
318 into CHO-HVEM cells was inhibited only by one out of three inhibitors, NH<sub>4</sub>Cl (Fig. 7D) and  
319 likely does not require endosomal acidification. Interestingly, HSV-1 entry into both C10 and  
320 CHO-HVEM cells was inhibited by NH<sub>4</sub>Cl and monensin but not by BFLA (Figs. 7A and C).  
321 We hypothesize that the discrepancy in the inhibitory effects among the three inhibitors could  
322 potentially be due to the distinct mechanisms by which BFLA, NH<sub>4</sub>Cl, and monensin raise  
323 endosomal pH.

324

325 ***Glycoprotein C (gC) increases entry efficiency into CHO-HVEM and HaCaT cells.*** The much  
326 narrower tropism of VSVΔG-BHLD pseudotype relative to HSV-1 suggested that envelope  
327 proteins outside the essential four may contribute to HSV-1 tropism and entry efficiency. To test  
328 this hypothesis, we generated a VSV-pseudotype containing gC in addition to gB, gH, gL, and  
329 gD (VSVΔG-BHLD-gC) (Fig. 8A). To generate the VSVΔG-BHLD-gC pseudotype at  
330 sufficiently high titers suitable for entry experiments, the amount of gB plasmid transfected into  
331 HEK293T cells was increased. The corresponding VSVΔG-BHLD-pCAGGS control was  
332 generated similarly. For yet unclear reasons, VSVΔG-BHLD-pCAGGS entered CHO-nectin-1,  
333 CHO-HVEM, and HaCaT cells (Fig. 8B) more efficiently than the VSVΔG-BHLD pseudotype

334 (Fig. 1A). Transfection of higher amounts of the gB plasmid could, in principle, lead to a higher  
335 expression levels of gB in the cells and, consequently, higher incorporation into the virions.  
336 More importantly, however, the VSV $\Delta$ G-BHLD-gC pseudotype entered CHO-HVEM and  
337 HaCaT cells with a significantly higher efficiency than the VSV $\Delta$ G-BHLD-pCAGGS  
338 pseudotype (Fig. 8B). These results suggest that gC can increase cell entry efficiency in a cell-  
339 specific manner.

340

## 341 **Discussion**

342 Decades ago, glycoproteins gB, gH, gL, and gD were established as essential for HSV-1 entry  
343 (6-8). These four glycoproteins are also sufficient for cell-cell fusion when co-expressed in  
344 uninfected, receptor-bearing cells (11, 12). While these studies greatly increased our  
345 understanding of the HSV-1 entry and fusion mechanisms, it was unclear whether these four  
346 glycoproteins were sufficient to specify cellular tropism and the selection of entry routes, partly  
347 due to the presence of up to 12 other envelope proteins. To begin addressing this, we generated a  
348 VSV-based pseudotype containing HSV-1 gB, gH, gL, and gD. Being devoid of other HSV-1  
349 proteins, the VSV $\Delta$ G-BHLD pseudotype provides a bare-bones platform to identify  
350 contributions of the core set of four essential glycoproteins to HSV-1 cellular tropism and the  
351 selection of entry routes.

352 Previously, we showed that the VSV $\Delta$ G-BHLD pseudotype efficiently entered C10 cells  
353 and that its entry recapitulated several important features of HSV-1 entry into susceptible cells:  
354 the requirement for gB, gH, gL, gD, and a gD receptor and sensitivity to anti-gB and anti-gH/gL  
355 neutralizing antibodies (39). Here, we expanded this study to six additional HSV-1-susceptible  
356 cell lines and made two key observations. First, we found that in addition to C10 cells, only

357 CHO-HVEM cells supported appreciable VSV $\Delta$ G-BHLD entry. Second, VSV $\Delta$ G-BHLD and  
358 HSV-1 entered these two cell lines by distinct endocytic mechanisms as judged by the  
359 differences in sensitivity to various inhibitors (Fig. 9 and Table S1). These results imply that  
360 alone, gB, gH, gL, and gD permit entry of VSV pseudotypes only into a limited range of HSV-1-  
361 susceptible cell types and even then, do not specify native entry routes. On the basis of these  
362 results, we hypothesize that other HSV-1 envelope proteins may have underappreciated roles in  
363 defining HSV-1 tropism, entry route selection, or both. Although it may be too early to conclude  
364 that the incorporation of gC into the VSV $\Delta$ G-BHLD pseudotype has changed its tropism, the  
365 increase in cell-specific entry efficiency of the VSV $\Delta$ G-BHLD-gC pseudotype supports the use  
366 of the pseudotyping platform developed here for future gain-of-function studies. In these future  
367 studies, changes in tropism, entry routes, or both, may be uncovered.

368  
369 ***VSV $\Delta$ G-BHLD pseudotype has a narrower cellular tropism than HSV-1.*** HSV-1 can infect a  
370 wide range of receptor-bearing cell types from different species [reviewed in (25)]. However, the  
371 VSV $\Delta$ G-BHLD pseudotype has a narrower tropism, efficiently entering only 2 out of 7 tested  
372 cell lines. Puzzlingly, while VSV $\Delta$ G-BHLD entered two engineered rodent cell lines, it exhibited  
373 little to no entry into the four human and primate cell lines typically used in HSV-1 studies, even  
374 at an MOI of 10. The lack of VSV $\Delta$ G-BHLD entry did not correlate with the HSV-1 entry route  
375 into these cells, namely, endocytosis for HeLa and HaCaT (5, 46) vs. plasma membrane for Vero  
376 and SH-SY5Y (5, 44). Additionally, there was no clear correlation with the receptor type (nectin-  
377 1 vs. HVEM) or with the cell type. While any of these factors – species, cell type, receptor, or  
378 route of entry – could potentially account for the decreased entry efficiency observed for  
379 VSV $\Delta$ G-BHLD pseudotype, none stood out as major infectivity determinants.

380           We do not yet fully understand the reasons for the observed differences in tropism  
381 between the VSV $\Delta$ G-BHLD pseudotype and HSV-1. At a first glance, the differences in virion  
382 structure – bullet-shaped vs. spherical – could be responsible for the phenotypic differences.  
383 However, the apparent differences in the entry of VSV $\Delta$ G-BHLD, VSV $\Delta$ G-G, and VSV $\Delta$ G-  
384 PIV5 pseudotypes, all of which share the same VSV structure, suggest that virion structure is  
385 unlikely to be a major factor responsible for the observed differences in entry of VSV $\Delta$ G-BHLD  
386 and HSV-1. The gB:gH:gL:gD ratios were also similar between VSV $\Delta$ G-BHLD and HSV-1. The  
387 two viruses could, however, differ in lipid composition because VSV and HSV-1 acquire their  
388 envelopes from different sources. VSV buds at the plasma membrane (PM) (27) whereas HSV-1  
389 buds at the trans-Golgi network (TGN) (42) or endosome-derived vesicles (43). However,  
390 according to recent lipidomics studies, the PM, the TGN, and the endosomes have similar lipid  
391 compositions (84). While we acknowledge that even small differences in lipid composition of the  
392 envelope could potentially contribute to differences in entry routes, this line of inquiry is beyond  
393 the scope of the present study. Moreover, no benchmarks are in place because HSV-1 lipid  
394 composition is unknown and cannot be altered on demand.

395           Importantly, VSV pseudotypes have been successfully used to study the entry of  
396 enveloped viruses regardless of the envelope origin. In addition to viruses that, like VSV, acquire  
397 their envelopes from the plasma membrane (Ebola virus, Lassa virus, Lujo virus) (31-34),  
398 viruses that derive their envelopes from the ER (Hepatitis C virus, Japanese encephalitis virus)  
399 (37, 38) or the Golgi (Hantavirus, Rift Valley fever virus) (35, 36) have also been studied. These  
400 observations suggest that VSV pseudotypes can provide important insights into viral entry  
401 mechanisms regardless of envelope origins.

402           This leaves differences in glycoprotein content as a potential reason for the differences in  
403 tropism. HSV-1 has up to 12 envelope proteins outside of the core set of four, which are absent  
404 from VSV $\Delta$ G-BHLD. We hypothesize that efficient entry by HSV-1 into susceptible cells  
405 requires one or more of these other proteins. Indeed, some of them have already been shown to  
406 increase HSV-1 entry efficiency. For example, deletion of the N terminus of glycoprotein K (gK)  
407 promoted inefficient endocytic entry into Vero cells (85, 86), which normally support entry by  
408 fusion at the plasma membrane (44). The N terminus of gK may thus regulate the fusion of the  
409 viral envelope with the plasma membrane (85). Another HSV-1 glycoprotein, gC, aids viral  
410 attachment by binding heparan sulfate moieties of cell surface proteoglycans (87) and promotes  
411 efficient entry into cells that HSV-1 enters by an endocytic route (88). Thus, envelope proteins  
412 outside of the core set of four could, indeed, modulate HSV-1 tropism by tuning entry efficiency.  
413 In other words, the more efficiently HSV-1 enters a given cell type, the more likely that cell type  
414 is to be successfully infected.

415           This hypothesis could be tested by adding the “non-essential” envelope proteins one-by-  
416 one into the VSV $\Delta$ G-BHLD pseudotype to test for their ability to restore entry into specific cell  
417 lines. For example, the incorporation of gK into the VSV $\Delta$ G-BHLD pseudotype (VSV $\Delta$ G-  
418 BHLD-gK) would be expected to increase the entry efficiency into cells that HSV-1 enters by  
419 fusion at the plasma membrane (Vero and SH-SY5Y), whereas gC (VSV $\Delta$ G-BHLD-gC) could  
420 increase the entry efficiency into cells that HSV-1 enters by endocytosis (C10, CHO-nectin-1,  
421 CHO-HVEM, HeLa and HaCaT). Indeed, we found that incorporating gC into the VSV $\Delta$ G-  
422 BHLD pseudotype increased entry efficiency into CHO-HVEM and HaCaT cells. These results  
423 are consistent with the reduced entry efficiency of an HSV-1 mutant lacking gC into these cell

424 types (88). The mechanism underlying the gC-dependent gain-of-function phenotype of  
425 VSV $\Delta$ G-BHLD-gC will be explored in future work.

426

427 ***VSV $\Delta$ G-BHLD pseudotype is internalized differently from HSV-1.*** If HSV-1 gB, gH, gL, and  
428 gD were sufficient to specify the native routes of HSV-1 entry, then we would have expected the  
429 VSV $\Delta$ G-BHLD pseudotype to utilize the same entry routes into C10 and CHO-HVEM as HSV-  
430 1. However, while entry of both viruses occurred by endocytosis and required dynamin and  
431 cellular cholesterol but not caveolin-1 or actin polymerization, further investigation uncovered  
432 several notable differences in entry requirements (Fig. 9).

433 The first difference was that HSV-1 entry into C10 or CHO-HVEM cells was inhibited  
434 by the clathrin inhibitor Pitstop-2, suggesting that it occurred by CME, whereas VSV $\Delta$ G-BHLD  
435 entry was not. HSV-1 entry inhibition by Pitstop-2 was unexpected because HSV-1 does not  
436 appear to utilize clathrin for entry into several cell lines, including HaCaT (89), CHO-nectin-1  
437 (90), Vero, HeLaS3, and HeLaCNX cells (91). However, the role of clathrin in entry into C10 or  
438 CHO-HVEM cells had not been assessed prior to this study. Moreover, recent work has  
439 suggested that HSV-1 entry into a human oligodendrocytic cell line (HOG) depends on clathrin  
440 (92). Therefore, HSV-1 may utilize CME in a cell-specific manner.

441 Unlike HSV-1 entry, VSV $\Delta$ G-BHLD entry into C10 or CHO-HVEM cells was not  
442 inhibited by Pitstop-2, which implicated CIE, rather than CME, as the entry route.

443 Macropinocytosis is a common CIE used by several viruses, but VSV $\Delta$ G-BHLD entry into both  
444 C10 and CHO-HVEM cells was insensitive to the inhibitor of actin polymerization, cytochalasin  
445 D, as was HSV-1. Given the essential role of actin polymerization in macropinocytosis (68, 71),  
446 these data suggest that macropinocytosis is not the primary entry mechanism for VSV $\Delta$ G-BHLD



447 pseudotype or HSV-1. Accordingly, VSV $\Delta$ G-BHLD particles did not colocalize with a fluid  
448 phase uptake marker 70 kDa rhodamine-B-labeled dextran to an appreciable extent. The lack of  
449 actin involvement in HSV-1 entry was not entirely surprising because its requirement, as deemed  
450 by cytochalasin D treatment, varies from cell line to cell line. For example, cytochalasin D  
451 treatment blocked entry into CHO-nectin-1 cells (90) but not into primary keratinocytes or  
452 HaCaT cells (89).

453         Unexpectedly, VSV $\Delta$ G-BHLD entry into both C10 and CHO-HVEM cells was sensitive  
454 to two other inhibitors of macropinocytosis, EIPA and NSC23766. If the VSV $\Delta$ G-BHLD  
455 pseudotype does not enter cells by macropinocytosis, why is its entry sensitive to EIPA and  
456 NSC23766? One possibility is that the respective targets of these inhibitors, Na<sup>+</sup>/H<sup>+</sup> exchangers  
457 and Rac1, could contribute to VSV $\Delta$ G-BHLD entry independently of their roles in  
458 macropinocytosis. For example, EIPA inhibits the function of other cellular GTPases like Rac1  
459 and Cdc42 (69) whereas NSC23766 could affect other downstream targets of Rac1 [reviewed in  
460 (93)]. Alternatively, EIPA and NSC23766 could inhibit VSV $\Delta$ G-BHLD entry due to their  
461 documented pleotropic effects on the cell. EIPA treatment can lead to a gross reorganization of  
462 the endosomal network and changes in Na<sup>+</sup> and H<sup>+</sup> gradients in the cell (94, 95). Similarly, Rac1,  
463 the target of NSC23766, is involved in several cellular processes in addition to regulating the  
464 actin cytoskeleton (96).

465

466 ***VSV $\Delta$ G-BHLD pseudotype and HSV-1 differ in late-stage entry requirements.*** Many viruses  
467 that enter by endocytosis, for example, influenza A and VSV, rely on Rab-GTPase-dependent  
468 endosomal maturation and acidification (74). VSV $\Delta$ G-BHLD entry into C10 cells required Rab5,  
469 an early endosome marker, and endosomal acidification. VSV $\Delta$ G-BHLD entry into CHO-HVEM

470 cells and HSV-1 entry into both C10 and CHO-HVEM cells did not require either Rab5, or  
471 Rab7, or endosomal acidification. Nevertheless, efficient entry of HSV-1 into both C10 and  
472 CHO-HVEM cells required Arf6, a small GTPase involved in endosomal trafficking, including  
473 CME and CIE (79). How Arf6 promotes HSV-1 entry is yet unclear considering its numerous  
474 downstream effectors, including lipid modifying enzymes, proteins involved in endosome  
475 trafficking, GTPase activating proteins (GAPs) and guanine exchange factors (GEFs) for other  
476 GTPases [reviewed in (79)]. In contrast, Arf6 was dispensable for VSV $\Delta$ G-BHLD entry.

477         One notable difference between VSV $\Delta$ G-BHLD and HSV-1 entry into C10 cells was that  
478 VSV $\Delta$ G-BHLD entry required endosomal acidification. Previous work suggested that HSV-1  
479 entry into C10 cells did not require endosomal acidification (45). Indeed, we confirmed that  
480 HSV-1 entry into C10 cells was insensitive to bafilomycin A1 (BFLA), a well-known inhibitor  
481 of endosomal acidification. The requirement for endosomal acidification for VSV $\Delta$ G-BHLD  
482 entry into C10 cells was unexpected. The membrane fusion itself may not require low pH, in  
483 agreement with the observations that cell-cell fusion in the presence of gB, gH, gL, and gD  
484 occurs at neutral pH (13). However, concomitant with the endosomal acidification, there are  
485 significant changes in endosomal ion concentrations and lipid content (97), which could affect  
486 membrane fusion or the fusion pore expansion. Therefore, we hypothesize that during VSV $\Delta$ G-  
487 BHLD entry, endosomal acidification promotes the establishment of endosomal conditions  
488 conducive to fusion and that in HSV-1, envelope proteins outside the essential four may  
489 functionally replace endosomal acidification.

490         Surprisingly, HSV-1 entry into both C10 and CHO-HVEM cells was inhibited by two  
491 other inhibitors of endosomal acidification, NH<sub>4</sub>Cl and monensin. Previous work showed that  
492 HSV-1 entry into CHO-HVEM cells was sensitive to inhibitors of endosomal acidification

493 ammonium chloride ( $\text{NH}_4\text{Cl}$ ) and monensin (46, 98), indicating a requirement for endosomal  
494 acidification. While  $\text{NH}_4\text{Cl}$  and monensin alkalinize the lumen of endosomes, the mechanisms  
495 by which they do so differ dramatically from BFLA.  $\text{NH}_4\text{Cl}$ , when dissolved, exists in  
496 equilibrium as  $\text{NH}_3$  and  $\text{NH}_4^+$ . Upon entering acidic environment, e.g., an endosome,  $\text{NH}_3$   
497 becomes protonated to  $\text{NH}_4^+$ , which leads to an increase in endosomal pH (97). Monensin is a  
498 carboxylic ionophore that utilizes an electroneutral exchange of monovalent cations for protons,  
499 effectively raising the endosomal pH (97). In parallel to these alkalinizing effects,  $\text{NH}_4\text{Cl}$  and  
500 monensin can affect other cellular processes, e.g., vacuolization or organelle swelling. In  
501 contrast, BFLA functions by specifically blocking the function of the  $V_0$  domain of V-ATPases  
502 thereby blocking the movement of protons across the endosomal membrane (99). At the nM  
503 concentrations used, BFLA is very specific and potent in its action. Therefore, given that HSV-1  
504 entry into either C10 or CHO-HVEM cells was not blocked by BFLA, we hypothesize that it  
505 does not require endosomal acidification. Sensitivity of HSV-1 entry to  $\text{NH}_4\text{Cl}$  and monensin  
506 could, instead, be due to their ability to interfere with other cellular processes. Both compounds  
507 alter ion content of the endosomes and cause vacuolization (97). While the impact of endosome  
508 vacuolization on HSV-1 entry has not been investigated, a change in endosomal ion  
509 concentration could, potentially, reduce the ability of HSV-1 to fuse with the endosomal  
510 membrane. Indeed, binding of HSV-1 to the cell surface releases intracellular  $\text{Ca}^{2+}$  stores (100)  
511 and increases intracellular levels of  $\text{Cl}^-$  ions (101), both of which appear important for  
512 subsequent entry.

513 Collectively, we hypothesize that HSV-1, which does not require Rab5/7 or endosomal  
514 acidification, fuses with the endosomal membrane prior to maturation of the newly formed  
515 vesicle into an early endosome [pH ~6.2 (102)] (Fig. 9). This latter scenario is consistent with

516 the rapid nature of HSV-1 entry into both C10 and B78A10 cells (B78 murine melanoma cells  
517 expressing HVEM) cells ( $t_{1/2} = 8-10$  minutes) (45). Alternatively, endosomal maturation status  
518 does not influence HSV-1 fusion with the membrane of the endocytic vesicle. VSV $\Delta$ G-BHLD  
519 entry into CHO-HVEM cells, likewise, does not require Rab5/7 or endosomal acidification,  
520 implying that VSV $\Delta$ G-BHLD may fuse with the endosomal membrane prior to delivery of the  
521 endocytic vesicle to an early endosome. By contrast, VSV $\Delta$ G-BHLD entry into C10 cells  
522 requires both Rab5 and endosomal acidification, which suggests that VSV $\Delta$ G-BHLD fuses with  
523 membranes of early endosomes. This would suggest that during HSV-1 entry into C10 cells,  
524 other envelope proteins may enable fusion prior to endosomal acidification.

525         As this and other studies show, HSV-1 entry is a complex phenomenon that requires at  
526 least four glycoproteins (gB, gH, gL, and gD) that operate in the presence of up to 12 additional  
527 envelope proteins, understudied with regard to entry. By establishing a platform where the  
528 functionality of the four essential HSV-1 entry glycoproteins could be evaluated in isolation, we  
529 demonstrated that they are insufficient to define HSV-1 tropism or specify native entry routes.  
530 We have expanded the use of this platform by demonstrating that incorporation of an additional  
531 envelope protein, gC, can lead to increased entry. Collectively, our work implicates other HSV-1  
532 envelope proteins as underappreciated, yet potentially important contributors to HSV-1 tropism,  
533 entry route selection, and, ultimately, pathogenesis.

534

## 535 **Materials and Methods**

536 **Cells.** HEK293T (gift from John Coffin, Tufts University), Vero (ATCC® CCL-81™), HeLa  
537 (ATCC® CCL-2™), and HaCaT cells (gift from Jonathan Garlick, Tufts University) were grown  
538 in Dulbecco's modified Eagle medium (DMEM; Lonza) containing high glucose, and sodium

539 pyruvate, supplemented with L-glutamine (Caisson Labs), 10% heat inactivated fetal bovine  
540 serum (HI-FBS; Life Technologies) and 1X penicillin/streptomycin (pen/strep) solution  
541 (Corning). B78H1 cells (a gift from Gary Cohen, University of Pennsylvania) were grown in  
542 DMEM containing high glucose, sodium pyruvate, and L-glutamine supplemented with 5% FBS  
543 and pen/strep solution (1X). C10 cells (a gift from Gary Cohen, University of Pennsylvania), a  
544 clonal B78H1-derivative stably expressing human nectin-1, were grown in DMEM containing  
545 high glucose, sodium pyruvate, and L-glutamine supplemented with 5% FBS and pen/strep  
546 solution (1X) and maintained under selection for nectin-1 expression with 250 µg/ml of G418  
547 (Selleck Chemical) as done previously (39). CHO-K1 cells were grown in Ham's F12 medium  
548 containing 10% FBS and pen/strep solution (1X). CHO-HVEM cells, a derivative of CHO-K1  
549 cells that stably express human HVEM, were grown in Ham's F12 medium containing 10% FBS  
550 and penicillin-streptomycin solution (1X), 250 µg/ml G418 and 150 µg/ml of puromycin (AG  
551 Scientific). CHO-K1 and CHO-HVEM cells were a gift from Anthony Nicola (Washington State  
552 University). CHO-nectin-1 cells, a derivative of CHO-K1 cells that stably express human nectin-  
553 1 were grown in Ham's F12 medium containing 10% FBS and penicillin-streptomycin solution  
554 (1X), 250 µg/ml G418 and 5 µg/ml of puromycin (AG Scientific). CHO-nectin-1 cells were a gift  
555 from Richard Longnecker (Northwestern University). SH-SY5Y cells were maintained in  
556 EMEM (Sigma-Aldrich) supplemented with 15% HI-FBS and 1X penicillin/streptomycin. SH-  
557 SY5Y cells were a kind gift from Stephen Moss (Tufts University).

558

559 **Plasmids.** Plasmids pPEP98, pPEP99, pPEP100, and pPEP101 carry the full-length HSV-1  
560 (strain KOS) genes for gB, gD, gH, and gL, respectively in a pCAGGS vector background.  
561 These were kindly gifted by P.G. Spear (Northwestern University). pCMV-VSV-G, which

562 contains the full-length gene for the VSV glycoprotein, G, was a gift from Judith White  
563 (University of Virginia). Rab GTPase dominant negative constructs [mCherry-Rab5DN(S34N)  
564 and dsRed-Rab7DN] were purchased from Addgene (76, 77). For consistency, the dsRed in  
565 dsRed-Rab7DN was replaced with mCherry by amplifying mCherry with the following primers:  
566 5'-AGCGCTACCGGTCGCCACCATGGTGAGCAAGGGCGAG-3' (forward) and 5'-  
567 AATTCGAAGCTTGAGCTCGAGATCTGAGCTTGTACAGCTCGTCCATGCC-3' (reverse).  
568 mCherry was then cloned in frame with Rab7DN using AgeI and HindIII cut sites that were  
569 engineered into the forward and reverse primers, respectively. As our HSV-1 reporter strain uses  
570 tdTomato, eGFP-RabDN constructs were engineered. The same primers were used to amplify  
571 eGFP from pEGFP-N2. The same cloning procedure was used to replace mCherry and dsRed  
572 with eGFP in the Rab5DN and Rab7DN constructs, respectively. Isolated clones were sequenced  
573 to verify mCherry and eGFP were in frame with the DN Rab genes. HSV-1 gC was amplified  
574 from HSV-1 (F strain) BAC DNA (GS6000) with the following primers: 5'-  
575 CGAGCTCGGCCACCATGGCCCCGGGGCGGG-3' (forward) and 5'-  
576 GGGGTACCCCTCACGTAGAATCGAGACCGAGGAGAGGGTTAGGGATAGGCTTACCC  
577 CGCCGATGACGCTGCCG-3' (reverse). The amplicon was digested with SacI and KpnI and  
578 cloned into the expression vector, pCAGGS. The C-terminus of gC was tagged with a V5  
579 epitope tag for western blot purposes.

580

581 **Antibodies.** Nectin-1 antibody [clone CK41 (103)] conjugated to phycoerythrin (PE) was  
582 purchased from BD Biosciences. PE-isotype antibody was also purchased from BD Biosciences.  
583 HVEM antibody (R140) was a gift from Gary Cohen (University of Pennsylvania). Caveolin-1  
584 antibody (clone 4H312) was purchased from Santa Cruz Biotechnology.  $\beta$ -actin antibody

585 conjugated to horse radish peroxidase(sc-47778 HRP) was purchased from Santa Cruz  
586 Biotechnology. Anti-V5 antibody (V8137) was purchased from Sigma-Aldrich.  
587  
588 **Chemical inhibitors.** Monensin, methyl- $\beta$ -cyclodextrin, cytochalasin D, Pitstop-2, and EIPA  
589 were purchased from Sigma. Dynasore and MitMAB were purchased from Calbiochem.  
590 Bafilomycin A1 was purchased from ApexBio. Ammonium chloride was purchased from Fisher  
591 Scientific. Dyngo-4a was purchased from Abcam. NSC23766 was purchased from Santa Cruz  
592 Biotechnology.  
593  
594 **Viruses.** Pseudotyped viral particles (VSV $\Delta$ G-BHLD) were generated as described previously  
595 (39). Briefly, HEK293T cells (5.5 x 10<sup>6</sup> cells/10 cm dish) were transfected with 2.5  $\mu$ g each  
596 pPEP98, pPEP99, pPEP100, and pPEP101 using polyethyleneimine (PEI at 1 mg/ml) at a 3:1  
597 weight ratio of PEI to DNA. VSV $\Delta$ G-BHLD-pCAGGS and VSV $\Delta$ G-BHLD-gC were generated  
598 by transfecting HEK293T cells with 10  $\mu$ g pPEP98 and 2.5  $\mu$ g each of pPEP99, pPEP100,  
599 pPEP101, and pCAGGS or pCAGGS-gC-V5 using GenJet Ver. II (SignaGen Laboratories). In  
600 all cases, 24 hours post transfection, cells were infected at an MOI = 3 with VSV $\Delta$ G-G (VSV $\Delta$ G  
601 pseudotyped with VSV G protein) and incubated at 30° C. Forty-eight hours post infection,  
602 supernatants were collected, cleared of cell debris (two spins at 1500 x g for 10 minutes each),  
603 and stored at -80° C. VSV $\Delta$ G-BHLD, VSV $\Delta$ G-BHLD-pCAGGS, and VSV $\Delta$ G-BHLD-gC titers  
604 were determined on C10 cells.

605 HSV-1 (GS3217, F strain) was kindly provided by Gregory Smith (Northwestern  
606 University). GS3217 contains a tdTomato reporter gene with a nuclear localization signal under  
607 control of a CMV immediate early (IE) promoter (104). HSV-1 was propagated on Vero cells,

608 and titers were determined by plaque assay on Vero cells as previously described (105).  
609 VSVΔG-G helper virus was generated by Michael Whitt (University of Tennessee) and kindly  
610 provided by Judith White (University of Virginia). New stocks were generated similarly to the  
611 VSVΔG-BHLD pseudotypes, replacing the HSV-1 glycoproteins with pCMV-VSV-G (10 μg per  
612 10 cm dish). VSVΔG-G titers were determined on C10 cells. VSVΔG-PIV5 was generated and  
613 kindly provided by S.P.J. Whelan (Washington University). As VSVΔG-PIV5 contains the PIV5  
614 HN and F proteins in the VSV genome, no complementation *in trans* was necessary. VSVΔG-  
615 PIV5 was grown on HEK293T cells and titers were determined on C10 cells. Entry of the VSV  
616 pseudotypes (VSVΔG-BHLD, VSVΔG-G, VSVΔG-PIV5, VSVΔG-BHLD-pCAGGS, and  
617 VSVΔG-BHLD-gC) was assessed by the expression of the GFP reporter driven by the promoter  
618 within the 3' leader sequence of the VSV genome.

619  
620 **Entry experiments.**  $3 \times 10^5$  B78H1, C10, CHO-K1, CHO-nectin-1, CHO-HVEM, HeLa, HaCaT,  
621 Vero, or SH-SY5Y cells were seeded in 35 mm dishes. Cells were infected with viruses at a  
622 MOI=1. Viruses were incubated with cells at 37° C for one hour. After one hour, viruses that had  
623 not entered were inactivated with a low pH wash (40 mM Na citrate, 10 mM KCl, 135 mM  
624 NaCl, pH 3.0). Complete growth media was added back to cells and infections were allowed to  
625 progress for six hours prior to analysis by flow cytometry. Entry experiments in the presence of  
626 inhibitors were performed similarly except that prior to infection, C10 and CHO-HVEM cells  
627 were pretreated with the indicated inhibitors for one hour prior to infection. All inhibitors, with  
628 the exception of sucrose and methyl-β-cyclodextrin, were present during the infection and the six  
629 hours post infection prior to analysis by flow cytometry by measuring tdTomato expression



630 (HSV-1 GS3217) or EGFP expression (VSV pseudotypes) to allow sufficient time for viral entry  
631 and expression of the fluorescent reporters.

632 Viral entry experiments in the presence of fluorescently labeled Rab GTPase dominant  
633 negative constructs were performed and analyzed as follows: cells infected with HSV-1  
634 (tdTomato) were transfected with pEGFP-N2 as an empty vector control or eGFP-tagged RabDN  
635 constructs whereas cells infected with VSV pseudotypes (eGFP) were transfected with  
636 pmCherry-C1 empty vector control or mCherry-tagged RabDN constructs. The data are  
637 represented as the percentage of infected and transfected cells out of the total number of  
638 transfected cells with either the empty vector control or the RabDN constructs.

639 Prior to flow cytometry analysis, cells were trypsinized, resuspended in media and  
640 pelleted at 450 x g for five minutes. Cells were washed with 1X PBS containing 1 mM EDTA (to  
641 prevent clumping). Cells were pelleted again at 450 x g for five minutes. Cells were then  
642 resuspended in 1X PBS with 1 mM EDTA and transferred to FACS tubes. Flow cytometry was  
643 performed on a BD LSR II or FACSCalibur instrument. tdTomato expression (HSV-1 GS3217)  
644 or EGFP expression (VSV pseudotypes) were measured as a proxy for viral entry. Data analysis  
645 was done using FlowJo software (v. 8.8.7).

646  
647 ***Analyses of receptor expression by flow cytometry.*** Nectin-1 was detected on the surface of cells  
648 by staining them with anti-nectin-1 antibody CK41 conjugated to PE (BD Biosciences). HVEM  
649 was detected on the surface of cells using the anti-HVEM polyclonal antibody, R140, a gift from  
650 Gary Cohen (University of Pennsylvania), and a FITC-conjugated anti-rabbit secondary antibody  
651 (ThermoFisher). Briefly,  $1 \times 10^6$  cells were plated into 10 cm dishes. The next day, cells were  
652 lifted from the dishes with 1X-PBS containing 5 mM EDTA. Cells were then pelleted,

653 resuspended in 300  $\mu$ l FACS buffer (1X-PBS, 2% FBS, 1 mM EDTA), and divided evenly  
654 between microfuge tubes for mock, PE-isotype, or PE-anti-nectin-1 treatment. Cells were  
655 incubated with 1  $\mu$ g of antibody for 30 minutes on ice with agitation every 10 minutes. Similarly,  
656 cells were divided for mock, isotype (anti-gB R68 polyclonal antibody), or R140 anti-HVEM  
657 treatment. Cells were incubated with 5  $\mu$ g of antibody. Mock, isotype, and R140-labeled cells  
658 were then incubated with a FITC-conjugated anti-rabbit secondary antibody (ThermoFisher).  
659 After 30 minutes, cells were pelleted and washed three times with FACS buffer, re-suspended,  
660 then immediately analyzed by flow cytometry (FACSCalibur).

661  
662 ***Virus purification and densitometry analysis.*** HSV-1 and VSV $\Delta$ G-BHLD virions were purified  
663 and subjected to immunoblot for gB, gH, gL, and gD. Briefly, five T-175 flasks of Vero cells  
664 were infected with HSV-1 (MOI 0.01). HSV-1 was crudely purified as previously described  
665 (105). HSV-1 particles were then purified over a continuous 15-50% sucrose gradient (106). The  
666 purified band of HSV-1 was collected by puncture and aspiration. VSV $\Delta$ G-BHLD virions were  
667 generated as previously mentioned (see *Viruses* section of Materials and Methods). VSV $\Delta$ G-  
668 BHLD particles were then pelleted at 20,000 RPM. VSV $\Delta$ G-BHLD virions were then  
669 resuspended and purified over a continuous 15-35% Optiprep gradient [protocol adapted from  
670 (107, 108)] and collected by puncture and aspiration. HSV-1 and VSV $\Delta$ G-BHLD virions were  
671 pelleted at 20,000 RPM. Western blots for gB, gH, gL, and gD were done using the rabbit  
672 polyclonal R68 antibody (gB), the rabbit polyclonal R137 antibody (gH), the mouse monoclonal  
673 antibody L1 (gL), and the rabbit polyclonal antibody R7 (gD). Secondary antibodies from LI-  
674 COR were used in order to perform densitometry analysis using the Image Studio Lite software  
675 (IRDye<sup>®</sup> 680RD goat anti-rabbit and IRDye<sup>®</sup> 800CW goat anti-mouse). Raw densitometry

676 values for gH, gL, and gD blots were normalized to their respective raw densitometry values for  
677 gB and reported as fold-differences to gB.

678

679 **Confocal microscopy.**  $1 \times 10^5$  cells (C10 and CHO-HVEM) were seeded onto 12 mm glass  
680 coverslips (Chemglass) in 24 well plates. Prior to labeling cells with specific markers of different  
681 endocytosis pathways, cells were pretreated with inhibitors for one hour at 37 °C. Post pre-  
682 treatment, cells were chilled to 4 °C for 10-15 minutes and were subsequently incubated with  
683 specific endocytic markers: Transferrin-Alexa Fluor 488 (50 µg/ml, Thermo Fisher Scientific),  
684 70-kD dextran-rhodamine B (1 mg/ml, Thermo Fisher Scientific), or LysoTracker (1 µM, Thermo  
685 Fisher Scientific). Cells were incubated with endocytic markers for 10 minutes at 4° C. After the  
686 10-minute incubation, C10 cells were shifted to 37° C for 10 minutes and CHO-HVEM cells  
687 were shifted to 37° C for 30 minutes (Transferrin-Alexa Fluor 488 and LysoTracker) or 40  
688 minutes (70 kDa dextran) (109). After incubation at 37° C, cells were washed 3 times with 1X-  
689 PBS and fixed in 4% paraformaldehyde for 15 minutes at room temperature. Cells were washed  
690 three times with 1X-PBS and incubated with 2.5 µg/ml of DAPI (ThermoFisher Scientific)  
691 diluted in 1X-PBS for 15 minutes at room temperature. Cells were washed again three times with  
692 1X-PBS and mounted onto Prolong Gold Antifade (Life Technologies) on glass slides (Thermo  
693 Fisher Scientific). Coverslips were sealed with clear nail polish and analyzed by confocal  
694 microscopy using a Leica SPE microscope. Images were analyzed in Fiji (110). For 70-kDa  
695 dextran and VSVΔG-BHLD co-localization experiments, C10 and CHO-HVEM cells were  
696 incubated with 1 mg/ml 70 kDa dextran and VSVΔG-BHLD (MOI = 1) for 1 hour at 4° C to  
697 allow for virion attachment. Cells were then shifted to 37° C for 20 minutes. After 20 minutes,

698 cells were prepared for confocal microscopy by fixing with 4% paraformaldehyde, permeabilized  
699 and blocked with 1X PBS containing 5% normal goat serum and 0.3% Triton X-100. Cells were  
700 then incubated with anti-gB antibody (R68) overnight at 4° C. The next day, cells were incubated  
701 with a secondary antibody labeled with FITC for 1 hour at room temperature. Slides were then  
702 prepared as described above.

703

704 ***siRNA-mediated knockdown.*** Mouse caveolin-1 siRNA, and a control siRNA were purchased  
705 from Santa Cruz Biotechnologies. 50 pmol of siRNA (0.625 µg) (cav-1 or scramble [scr]) were  
706 diluted into 100 µl of Optimem. In another tube, 3.125 µl of PEI (1 mg/ml) was diluted into 100  
707 µl of Optimem. The diluted PEI was mixed with the diluted siRNA to a final ratio of 5:1 (w:w)  
708 of PEI to siRNA and incubated at room temperature for 30 minutes. The complex was added  
709 dropwise to CHO-HVEM cells plated in 35 mm dishes (3 x 10<sup>5</sup> cells/dish). Cells were incubated  
710 at 37° C for 48 hours before infection and subsequent flow cytometry analysis.

711

## 712 **Acknowledgments**

713 We thank Stephen Kwok and Allen Parmelee at the Tufts Laser Cytometry Core facility for their  
714 help with FACS experiments; Gary Cohen (University of Pennsylvania) for the gifts of  
715 antibodies and cell lines; Sean Whelan (Washington University) for the gift of VSVΔG-PIV5  
716 pseudotype; Anthony Nicola (Washington State University) for the gift of CHO-K1 and CHO-  
717 HVEM cells; Richard Longnecker (Northwestern University) for the gift of CHO-nectin-1 cells;  
718 John Coffin (Tufts University) for the gift of HEK293T cells; Stephen Moss (Tufts University)  
719 for the gift of SH-SY5Y cells; Jonathan Garlick (Tufts University) for the gift of HaCaT cells;  
720 Michael Forgac (Tufts University) for the gift of LysoTracker reagent; Gregory Smith

721 (Northwestern University) for the gift of HSV-1 GS3217 strain, and Michael Whitt (University  
722 of Tennessee) and Judith White (University of Virginia) for the gift of the VSVΔG-GFP  
723 pseudotyping platform. FACS experiments were performed at the Tufts Laser Cytometry Core  
724 facility.

725

## 726 **Competing Interests**

727 The authors declare no competing interests.

728

## 729 **Data sharing plan**

730 All data is included in the manuscript and supporting information.

731

## 732 **Funding information**

733 This work was funded by the NIH grant R21AI140711 (E.E.H.), a Faculty Scholar grant

734 55108533 from Howard Hughes Medical Institute (E.E.H.), and the NIH training grant

735 T32AI007329 (A.T.H.).

736

## 737 **References**

- 738 1. Steiner I, Benninger F. 2013. Update on herpes virus infections of the nervous system.  
739 *Curr Neurol Neurosci Rep* 13:414.
- 740 2. Bradley H, Markowitz LE, Gibson T, McQuillan GM. 2014. Seroprevalence of herpes  
741 simplex virus types 1 and 2--United States, 1999-2010. *J Infect Dis* 209:325-33.
- 742 3. Agelidis AM, Shukla D. 2015. Cell entry mechanisms of HSV: what we have learned in  
743 recent years. *Future Virol* 10:1145-1154.
- 744 4. Miranda-Saksena M, Denes CE, Diefenbach RJ, Cunningham AL. 2018. Infection and  
745 Transport of Herpes Simplex Virus Type 1 in Neurons: Role of the Cytoskeleton. *Viruses*  
746 10.
- 747 5. Nicola AV, Hou J, Major EO, Straus SE. 2005. Herpes simplex virus type 1 enters human  
748 epidermal keratinocytes, but not neurons, via a pH-dependent endocytic pathway. *J Virol*  
749 79:7609-16.

- 750 6. Cai WH, Gu B, Person S. 1988. Role of glycoprotein B of herpes simplex virus type 1 in  
751 viral entry and cell fusion. *J Virol* 62:2596-604.
- 752 7. Roop C, Hutchinson L, Johnson DC. 1993. A mutant herpes simplex virus type 1 unable  
753 to express glycoprotein L cannot enter cells, and its particles lack glycoprotein H. *J Virol*  
754 67:2285-97.
- 755 8. Ligas MW, Johnson DC. 1988. A herpes simplex virus mutant in which glycoprotein D  
756 sequences are replaced by beta-galactosidase sequences binds to but is unable to  
757 penetrate into cells. *J Virol* 62:1486-94.
- 758 9. Heldwein EE, Krummenacher C. 2008. Entry of herpesviruses into mammalian cells.  
759 *Cell Mol Life Sci* 65:1653-68.
- 760 10. Connolly SA, Jackson JO, Jardetzky TS, Longnecker R. 2011. Fusing structure and  
761 function: a structural view of the herpesvirus entry machinery. *Nat Rev Microbiol* 9:369-  
762 81.
- 763 11. Muggeridge MI. 2000. Characterization of cell-cell fusion mediated by herpes simplex  
764 virus 2 glycoproteins gB, gD, gH and gL in transfected cells. *J Gen Virol* 81:2017-27.
- 765 12. Turner A, Bruun B, Minson T, Browne H. 1998. Glycoproteins gB, gD, and gH/gL of  
766 herpes simplex virus type 1 are necessary and sufficient to mediate membrane fusion in a  
767 Cos cell transfection system. *J Virol* 72:873-5.
- 768 13. Atanasiu D, Saw WT, Cohen GH, Eisenberg RJ. 2010. Cascade of events governing cell-  
769 cell fusion induced by herpes simplex virus glycoproteins gD, gH/gL, and gB. *J Virol*  
770 84:12292-9.
- 771 14. Eisenberg RJ, Atanasiu D, Cairns TM, Gallagher JR, Krummenacher C, Cohen GH.  
772 2012. Herpes virus fusion and entry: a story with many characters. *Viruses* 4:800-32.
- 773 15. Spear PG, Eisenberg RJ, Cohen GH. 2000. Three classes of cell surface receptors for  
774 alphaherpesvirus entry. *Virology* 275:1-8.
- 775 16. Krummenacher C, Supekar VM, Whitbeck JC, Lazear E, Connolly SA, Eisenberg RJ,  
776 Cohen GH, Wiley DC, Carfi A. 2005. Structure of unliganded HSV gD reveals a  
777 mechanism for receptor-mediated activation of virus entry. *EMBO J* 24:4144-53.
- 778 17. Lazear E, Carfi A, Whitbeck JC, Cairns TM, Krummenacher C, Cohen GH, Eisenberg  
779 RJ. 2008. Engineered disulfide bonds in herpes simplex virus type 1 gD separate receptor  
780 binding from fusion initiation and viral entry. *J Virol* 82:700-9.
- 781 18. Cairns TM, Ditto NT, Atanasiu D, Lou H, Brooks BD, Saw WT, Eisenberg RJ, Cohen  
782 GH. 2019. Surface Plasmon Resonance Reveals Direct Binding of Herpes Simplex Virus  
783 Glycoproteins gH/gL to gD and Locates a gH/gL Binding Site on gD. *J Virol* 93.
- 784 19. Atanasiu D, Cairns TM, Whitbeck JC, Saw WT, Rao S, Eisenberg RJ, Cohen GH. 2013.  
785 Regulation of Herpes Simplex Virus gB-Induced Cell-Cell Fusion by Mutant Forms of  
786 gH/gL in the Absence of gD and Cellular Receptors. *Mbio* 4.
- 787 20. Gianni T, Amasio M, Campadelli-Fiume G. 2009. Herpes simplex virus gD forms  
788 distinct complexes with fusion executors gB and gH/gL in part through the C-terminal  
789 profusion domain. *J Biol Chem* 284:17370-82.
- 790 21. Atanasiu D, Whitbeck JC, de Leon MP, Lou H, Hannah BP, Cohen GH, Eisenberg RJ.  
791 2010. Bimolecular complementation defines functional regions of Herpes simplex virus  
792 gB that are involved with gH/gL as a necessary step leading to cell fusion. *J Virol*  
793 84:3825-34.

- 794 22. Chowdary TK, Cairns TM, Atanasiu D, Cohen GH, Eisenberg RJ, Heldwein EE. 2010.  
795 Crystal structure of the conserved herpesvirus fusion regulator complex gH-gL. *Nat*  
796 *Struct Mol Biol* 17:882-8.
- 797 23. Cooper RS, Heldwein EE. 2015. Herpesvirus gB: A Finely Tuned Fusion Machine.  
798 *Viruses* 7:6552-69.
- 799 24. Loret S, Guay G, Lippe R. 2008. Comprehensive characterization of extracellular herpes  
800 simplex virus type 1 virions. *J Virol* 82:8605-18.
- 801 25. Karasneh GA, Shukla D. 2011. Herpes simplex virus infects most cell types in vitro:  
802 clues to its success. *Virol J* 8:481.
- 803 26. Hilterbrand AT, Heldwein EE. 2019. Go go gadget glycoprotein!: HSV-1 draws on its  
804 sizeable glycoprotein tool kit to customize its diverse entry routes. *PLoS Pathog*  
805 15:e1007660.
- 806 27. Whitt MA. 2010. Generation of VSV pseudotypes using recombinant DeltaG-VSV for  
807 studies on virus entry, identification of entry inhibitors, and immune responses to  
808 vaccines. *J Virol Methods* 169:365-74.
- 809 28. Fukushi S, Mizutani T, Saijo M, Matsuyama S, Miyajima N, Taguchi F, Itamura S,  
810 Kurane I, Morikawa S. 2005. Vesicular stomatitis virus pseudotyped with severe acute  
811 respiratory syndrome coronavirus spike protein. *J Gen Virol* 86:2269-2274.
- 812 29. Fukushi S, Watanabe R, Taguchi F. 2008. Pseudotyped vesicular stomatitis virus for  
813 analysis of virus entry mediated by SARS coronavirus spike proteins. *Methods Mol Biol*  
814 454:331-8.
- 815 30. Nie J, Li Q, Wu J, Zhao C, Hao H, Liu H, Zhang L, Nie L, Qin H, Wang M, Lu Q, Li X,  
816 Sun Q, Liu J, Fan C, Huang W, Xu M, Wang Y. 2020. Establishment and validation of a  
817 pseudovirus neutralization assay for SARS-CoV-2. *Emerg Microbes Infect* 9:680-686.
- 818 31. Carette JE, Raaben M, Wong AC, Herbert AS, Obernosterer G, Mulherkar N, Kuehne AI,  
819 Kranzusch PJ, Griffin AM, Ruthel G, Dal Cin P, Dye JM, Whelan SP, Chandran K,  
820 Brummelkamp TR. 2011. Ebola virus entry requires the cholesterol transporter Niemann-  
821 Pick C1. *Nature* 477:340-3.
- 822 32. Jae LT, Raaben M, Riemersma M, van Beusekom E, Blomen VA, Velds A, Kerkhoven  
823 RM, Carette JE, Topaloglu H, Meinecke P, Wessels MW, Lefeber DJ, Whelan SP, van  
824 Bokhoven H, Brummelkamp TR. 2013. Deciphering the glycosylome of  
825 dystroglycanopathies using haploid screens for lassa virus entry. *Science* 340:479-83.
- 826 33. Jae LT, Raaben M, Herbert AS, Kuehne AI, Wirchnianski AS, Soh TK, Stubbs SH,  
827 Janssen H, Damme M, Saftig P, Whelan SP, Dye JM, Brummelkamp TR. 2014. Virus  
828 entry. Lassa virus entry requires a trigger-induced receptor switch. *Science* 344:1506-10.
- 829 34. Raaben M, Jae LT, Herbert AS, Kuehne AI, Stubbs SH, Chou YY, Blomen VA,  
830 Kirchhausen T, Dye JM, Brummelkamp TR, Whelan SP. 2017. NRP2 and CD63 Are  
831 Host Factors for Lujo Virus Cell Entry. *Cell Host Microbe* 22:688-696 e5.
- 832 35. Kleinfelter LM, Jangra RK, Jae LT, Herbert AS, Mittler E, Stiles KM, Wirchnianski AS,  
833 Kielian M, Brummelkamp TR, Dye JM, Chandran K. 2015. Haploid Genetic Screen  
834 Reveals a Profound and Direct Dependence on Cholesterol for Hantavirus Membrane  
835 Fusion. *mBio* 6:e00801.
- 836 36. Riblett AM, Blomen VA, Jae LT, Altamura LA, Doms RW, Brummelkamp TR,  
837 Wojcechowskyj JA. 2016. A Haploid Genetic Screen Identifies Heparan Sulfate  
838 Proteoglycans Supporting Rift Valley Fever Virus Infection. *J Virol* 90:1414-23.



- 839 37. Tani H, Komoda Y, Matsuo E, Suzuki K, Hamamoto I, Yamashita T, Moriishi K,  
840 Fujiyama K, Kanto T, Hayashi N, Owsianka A, Patel AH, Whitt MA, Matsuura Y. 2007.  
841 Replication-competent recombinant vesicular stomatitis virus encoding hepatitis C virus  
842 envelope proteins. *J Virol* 81:8601-12.
- 843 38. Tani H, Morikawa S, Matsuura Y. 2011. Development and Applications of VSV Vectors  
844 Based on Cell Tropism. *Front Microbiol* 2:272.
- 845 39. Rogalin HB, Heldwein EE. 2016. Characterization of Vesicular Stomatitis Virus  
846 Pseudotypes Bearing Essential Entry Glycoproteins gB, gD, gH, and gL of Herpes  
847 Simplex Virus 1. *J Virol* 90:10321-10328.
- 848 40. Robinson LR, Whelan SP. 2016. Infectious Entry Pathway Mediated by the Human  
849 Endogenous Retrovirus K Envelope Protein. *J Virol* 90:3640-9.
- 850 41. Krummenacher C, Baribaud F, Ponce de Leon M, Baribaud I, Whitbeck JC, Xu R, Cohen  
851 GH, Eisenberg RJ. 2004. Comparative usage of herpesvirus entry mediator A and nectin-  
852 1 by laboratory strains and clinical isolates of herpes simplex virus. *Virology* 322:286-99.
- 853 42. Henaff D, Radtke K, Lippe R. 2012. Herpesviruses exploit several host compartments for  
854 envelopment. *Traffic* 13:1443-9.
- 855 43. Hollinshead M, Johns HL, Sayers CL, Gonzalez-Lopez C, Smith GL, Elliott G. 2012.  
856 Endocytic tubules regulated by Rab GTPases 5 and 11 are used for envelopment of  
857 herpes simplex virus. *EMBO J* 31:4204-20.
- 858 44. Koyama AH, Uchida T. 1987. The mode of entry of herpes simplex virus type 1 into  
859 Vero cells. *Microbiol Immunol* 31:123-30.
- 860 45. Milne RS, Nicola AV, Whitbeck JC, Eisenberg RJ, Cohen GH. 2005. Glycoprotein D  
861 receptor-dependent, low-pH-independent endocytic entry of herpes simplex virus type 1.  
862 *J Virol* 79:6655-63.
- 863 46. Nicola AV, McEvoy AM, Straus SE. 2003. Roles for endocytosis and low pH in herpes  
864 simplex virus entry into HeLa and Chinese hamster ovary cells. *J Virol* 77:5324-32.
- 865 47. Dutta D, Donaldson JG. 2012. Search for inhibitors of endocytosis: Intended specificity  
866 and unintended consequences. *Cell Logist* 2:203-208.
- 867 48. Carpentier JL, Sawano F, Geiger D, Gorden P, Perrelet A, Orci L. 1989. Potassium  
868 depletion and hypertonic medium reduce "non-coated" and clathrin-coated pit formation,  
869 as well as endocytosis through these two gates. *J Cell Physiol* 138:519-26.
- 870 49. Bose S, Zokarkar A, Welch BD, Leser GP, Jardetzky TS, Lamb RA. 2012. Fusion  
871 activation by a headless parainfluenza virus 5 hemagglutinin-neuraminidase stalk  
872 suggests a modular mechanism for triggering. *Proc Natl Acad Sci U S A* 109:E2625-34.
- 873 50. Matlin KS, Reggio H, Helenius A, Simons K. 1982. Pathway of vesicular stomatitis virus  
874 entry leading to infection. *J Mol Biol* 156:609-31.
- 875 51. Superti F, Seganti L, Ruggeri FM, Tinari A, Donelli G, Orsi N. 1987. Entry pathway of  
876 vesicular stomatitis virus into different host cells. *J Gen Virol* 68 ( Pt 2):387-99.
- 877 52. Johannsdottir HK, Mancini R, Kartenbeck J, Amato L, Helenius A. 2009. Host cell  
878 factors and functions involved in vesicular stomatitis virus entry. *J Virol* 83:440-53.
- 879 53. Marsh M, Helenius A. 2006. Virus entry: open sesame. *Cell* 124:729-40.
- 880 54. Mercer J, Schelhaas M, Helenius A. 2010. Virus entry by endocytosis. *Annu Rev*  
881 *Biochem* 79:803-33.
- 882 55. Kirchhausen T. 2000. Clathrin. *Annu Rev Biochem* 69:699-727.
- 883 56. Singh M, Jadhav HR, Bhatt T. 2017. Dynamin Functions and Ligands: Classical  
884 Mechanisms Behind. *Mol Pharmacol* 91:123-134.



- 885 57. Quan A, McGeachie AB, Keating DJ, van Dam EM, Rusak J, Chau N, Malladi CS, Chen  
886 C, McCluskey A, Cousin MA, Robinson PJ. 2007. Myristyl trimethyl ammonium  
887 bromide and octadecyl trimethyl ammonium bromide are surface-active small molecule  
888 dynamin inhibitors that block endocytosis mediated by dynamin I or dynamin II. *Mol*  
889 *Pharmacol* 72:1425-39.
- 890 58. Cureton DK, Massol RH, Saffarian S, Kirchhausen TL, Whelan SP. 2009. Vesicular  
891 stomatitis virus enters cells through vesicles incompletely coated with clathrin that  
892 depend upon actin for internalization. *PLoS Pathog* 5:e1000394.
- 893 59. Mayor S, Parton RG, Donaldson JG. 2014. Clathrin-independent pathways of  
894 endocytosis. *Cold Spring Harb Perspect Biol* 6.
- 895 60. Pelkmans L, Kartenbeck J, Helenius A. 2001. Caveolar endocytosis of simian virus 40  
896 reveals a new two-step vesicular-transport pathway to the ER. *Nat Cell Biol* 3:473-83.
- 897 61. Xu Q, Cao M, Song H, Chen S, Qian X, Zhao P, Ren H, Tang H, Wang Y, Wei Y, Zhu  
898 Y, Qi Z. 2016. Caveolin-1-mediated Japanese encephalitis virus entry requires a two-step  
899 regulation of actin reorganization. *Future Microbiol* 11:1227-1248.
- 900 62. Williams TM, Lisanti MP. 2004. The caveolin proteins. *Genome Biol* 5:214.
- 901 63. de Almeida CJG. 2017. Caveolin-1 and Caveolin-2 Can Be Antagonistic Partners in  
902 Inflammation and Beyond. *Front Immunol* 8:1530.
- 903 64. Bender FC, Whitbeck JC, Ponce de Leon M, Lou H, Eisenberg RJ, Cohen GH. 2003.  
904 Specific association of glycoprotein B with lipid rafts during herpes simplex virus entry. *J*  
905 *Virol* 77:9542-52.
- 906 65. Chinnapen DJ, Chinnapen H, Saslowsky D, Lencer WI. 2007. Rafting with cholera toxin:  
907 endocytosis and trafficking from plasma membrane to ER. *FEMS Microbiol Lett*  
908 266:129-37.
- 909 66. Danthi P, Chow M. 2004. Cholesterol removal by methyl-beta-cyclodextrin inhibits  
910 poliovirus entry. *J Virol* 78:33-41.
- 911 67. Dou X, Li Y, Han J, Zarlenga DS, Zhu W, Ren X, Dong N, Li X, Li G. 2018. Cholesterol  
912 of lipid rafts is a key determinant for entry and post-entry control of porcine rotavirus  
913 infection. *BMC Vet Res* 14:45.
- 914 68. Mercer J, Helenius A. 2009. Virus entry by macropinocytosis. *Nat Cell Biol* 11:510-20.
- 915 69. Koivusalo M, Welch C, Hayashi H, Scott CC, Kim M, Alexander T, Touret N, Hahn  
916 KM, Grinstein S. 2010. Amiloride inhibits macropinocytosis by lowering  
917 submembranous pH and preventing Rac1 and Cdc42 signaling. *J Cell Biol* 188:547-63.
- 918 70. Gao Y, Dickerson JB, Guo F, Zheng J, Zheng Y. 2004. Rational design and  
919 characterization of a Rac GTPase-specific small molecule inhibitor. *Proc Natl Acad Sci*  
920 *U S A* 101:7618-23.
- 921 71. Hansen CG, Nichols BJ. 2009. Molecular mechanisms of clathrin-independent  
922 endocytosis. *J Cell Sci* 122:1713-21.
- 923 72. Cureton DK, Massol RH, Whelan SP, Kirchhausen T. 2010. The length of vesicular  
924 stomatitis virus particles dictates a need for actin assembly during clathrin-dependent  
925 endocytosis. *PLoS Pathog* 6:e1001127.
- 926 73. Spearman P. 2018. Viral interactions with host cell Rab GTPases. *Small GTPases* 9:192-  
927 201.
- 928 74. Sieczkarski SB, Whittaker GR. 2003. Differential requirements of Rab5 and Rab7 for  
929 endocytosis of influenza and other enveloped viruses. *Traffic* 4:333-43.

- 930 75. Langemeyer L, Frohlich F, Ungermann C. 2018. Rab GTPase Function in Endosome and  
931 Lysosome Biogenesis. *Trends Cell Biol* 28:957-970.
- 932 76. Bohdanowicz M, Balkin DM, De Camilli P, Grinstein S. 2012. Recruitment of OCRL  
933 and Inpp5B to phagosomes by Rab5 and APPL1 depletes phosphoinositides and  
934 attenuates Akt signaling. *Mol Biol Cell* 23:176-87.
- 935 77. Choudhury A, Dominguez M, Puri V, Sharma DK, Narita K, Wheatley CL, Marks DL,  
936 Pagano RE. 2002. Rab proteins mediate Golgi transport of caveola-internalized  
937 glycosphingolipids and correct lipid trafficking in Niemann-Pick C cells. *J Clin Invest*  
938 109:1541-50.
- 939 78. Tebaldi G, Pritchard, S.M., Nicola, A.V. 2020. Herpes simplex virus entry by a non-  
940 conventional endocytic pathway. *J Virol* doi:10.1128/JVI.01910-20.
- 941 79. Van Acker T, Tavernier J, Peelman F. 2019. The Small GTPase Arf6: An Overview of Its  
942 Mechanisms of Action and of Its Role in Host(-)Pathogen Interactions and Innate  
943 Immunity. *Int J Mol Sci* 20.
- 944 80. Garcia-Exposito L, Barroso-Gonzalez J, Puigdomenech I, Machado JD, Blanco J,  
945 Valenzuela-Fernandez A. 2011. HIV-1 requires Arf6-mediated membrane dynamics to  
946 efficiently enter and infect T lymphocytes. *Mol Biol Cell* 22:1148-66.
- 947 81. Heikkila O, Susi P, Tevaluoto T, Harma H, Marjomaki V, Hyypia T, Kiljunen S. 2010.  
948 Internalization of coxsackievirus A9 is mediated by  $\beta$ 2-microglobulin, dynamin, and  
949 Arf6 but not by caveolin-1 or clathrin. *J Virol* 84:3666-81.
- 950 82. Mercer J, Helenius A. 2008. Vaccinia virus uses macropinocytosis and apoptotic mimicry  
951 to enter host cells. *Science* 320:531-5.
- 952 83. Yoo JH, Shi DS, Grossmann AH, Sorensen LK, Tong Z, Mleynek TM, Rogers A, Zhu  
953 W, Richards JR, Winter JM, Zhu J, Dunn C, Bajji A, Shenderovich M, Mueller AL,  
954 Woodman SE, Harbour JW, Thomas KR, Odelberg SJ, Ostanin K, Li DY. 2016. ARF6 Is  
955 an Actionable Node that Orchestrates Oncogenic GNAQ Signaling in Uveal Melanoma.  
956 *Cancer Cell* 29:889-904.
- 957 84. Jackson CL, Walch L, Verbavatz JM. 2016. Lipids and Their Trafficking: An Integral  
958 Part of Cellular Organization. *Dev Cell* 39:139-153.
- 959 85. Musarrat F, Jambunathan N, Rider PJF, Chouljenko VN, Kousoulas KG. 2018. The  
960 Amino Terminus of Herpes Simplex Virus 1 Glycoprotein K (gK) Is Required for gB  
961 Binding to Akt, Release of Intracellular Calcium, and Fusion of the Viral Envelope with  
962 Plasma Membranes. *J Virol* 92.
- 963 86. Foster TP, Rybachuk GV, Kousoulas KG. 2001. Glycoprotein K specified by herpes  
964 simplex virus type 1 is expressed on virions as a Golgi complex-dependent glycosylated  
965 species and functions in virion entry. *J Virol* 75:12431-8.
- 966 87. Tal-Singer R, Peng C, Ponce De Leon M, Abrams WR, Banfield BW, Tufaro F, Cohen  
967 GH, Eisenberg RJ. 1995. Interaction of herpes simplex virus glycoprotein gC with  
968 mammalian cell surface molecules. *J Virol* 69:4471-83.
- 969 88. Komala Sari T, Gianopulos KA, Weed DJ, Schneider SM, Pritchard SM, Nicola AV.  
970 2020. Herpes Simplex Virus Glycoprotein C Regulates Low-pH Entry. *mSphere* 5.
- 971 89. Rahn E, Petermann P, Hsu MJ, Rixon FJ, Knebel-Morsdorf D. 2011. Entry pathways of  
972 herpes simplex virus type 1 into human keratinocytes are dynamin- and cholesterol-  
973 dependent. *PLoS One* 6:e25464.
- 974 90. Clement C, Tiwari V, Scanlan PM, Valyi-Nagy T, Yue BY, Shukla D. 2006. A novel role  
975 for phagocytosis-like uptake in herpes simplex virus entry. *J Cell Biol* 174:1009-21.

- 976 91. Devadas D, Koithan T, Diestel R, Prank U, Sodeik B, Dohner K. 2014. Herpes simplex  
977 virus internalization into epithelial cells requires Na<sup>+</sup>/H<sup>+</sup> exchangers and p21-activated  
978 kinases but neither clathrin- nor caveolin-mediated endocytosis. *J Virol* 88:13378-95.
- 979 92. Praena B, Bello-Morales R, Lopez-Guerrero JA. 2020. Hsv-1 Endocytic Entry into a  
980 Human Oligodendrocytic Cell Line is Mediated by Clathrin and Dynamin but Not  
981 Caveolin. *Viruses* 12.
- 982 93. Bid HK, Roberts RD, Manchanda PK, Houghton PJ. 2013. RAC1: an emerging  
983 therapeutic option for targeting cancer angiogenesis and metastasis. *Mol Cancer Ther*  
984 12:1925-34.
- 985 94. Fretz M, Jin J, Conibere R, Penning NA, Al-Taei S, Storm G, Futaki S, Takeuchi T,  
986 Nakase I, Jones AT. 2006. Effects of Na<sup>+</sup>/H<sup>+</sup> exchanger inhibitors on subcellular  
987 localisation of endocytic organelles and intracellular dynamics of protein transduction  
988 domains HIV-TAT peptide and octaarginine. *J Control Release* 116:247-54.
- 989 95. Gekle M, Drumm K, Mildenerberger S, Freudinger R, Gassner B, Silbernagl S. 1999.  
990 Inhibition of Na<sup>+</sup>-H<sup>+</sup> exchange impairs receptor-mediated albumin endocytosis in renal  
991 proximal tubule-derived epithelial cells from opossum. *J Physiol* 520 Pt 3:709-21.
- 992 96. Margiotta A, Bucci C. 2019. Coordination between Rac1 and Rab Proteins: Functional  
993 Implications in Health and Disease. *Cells* 8.
- 994 97. Huotari J, Helenius A. 2011. Endosome maturation. *EMBO J* 30:3481-500.
- 995 98. Gianni T, Campadelli-Fiume G, Menotti L. 2004. Entry of herpes simplex virus mediated  
996 by chimeric forms of nectin1 retargeted to endosomes or to lipid rafts occurs through  
997 acidic endosomes. *J Virol* 78:12268-76.
- 998 99. Zhang J, Feng Y, Forgac M. 1994. Proton conduction and bafilomycin binding by the V0  
999 domain of the coated vesicle V-ATPase. *J Biol Chem* 269:23518-23.
- 1000 100. Cheshenko N, Pierce C, Herold BC. 2018. Herpes simplex viruses activate phospholipid  
1001 scramblase to redistribute phosphatidylserines and Akt to the outer leaflet of the plasma  
1002 membrane and promote viral entry. *PLoS Pathog* 14:e1006766.
- 1003 101. Zheng K, Chen M, Xiang Y, Ma K, Jin F, Wang X, Wang X, Wang S, Wang Y. 2014.  
1004 Inhibition of herpes simplex virus type 1 entry by chloride channel inhibitors tamoxifen  
1005 and NPPB. *Biochem Biophys Res Commun* 446:990-6.
- 1006 102. Scott CC, Vacca F, Gruenberg J. 2014. Endosome maturation, transport and functions.  
1007 *Semin Cell Dev Biol* 31:2-10.
- 1008 103. Krummenacher C, Baribaud I, Sanzo JF, Cohen GH, Eisenberg RJ. 2002. Effects of  
1009 herpes simplex virus on structure and function of nectin-1/HveC. *J Virol* 76:2424-33.
- 1010 104. Stults AM, Smith GA. 2019. The Herpes Simplex Virus 1 Deamidase Enhances  
1011 Propagation but Is Dispensable for Retrograde Axonal Transport into the Nervous  
1012 System. *J Virol* 93.
- 1013 105. Marconi P, Manservigi R. 2014. Herpes simplex virus growth, preparation, and assay.  
1014 *Methods Mol Biol* 1144:19-29.
- 1015 106. Dai X, Zhou ZH. 2014. Purification of Herpesvirus Virions and Capsids. *Bio Protoc* 4.
- 1016 107. Kim DS, Dastidar H, Zhang C, Zemp FJ, Lau K, Ernst M, Rakic A, Sikdar S, Rajwani J,  
1017 Naumenko V, Balce DR, Ewanchuk BW, Taylor P, Yates RM, Jenne C, Gafuik C,  
1018 Mahoney DJ. 2017. Smac mimetics and oncolytic viruses synergize in driving anticancer  
1019 T-cell responses through complementary mechanisms. *Nat Commun* 8:344.
- 1020 108. Beug ST, Beauregard CE, Healy C, Sanda T, St-Jean M, Chabot J, Walker DE, Mohan A,  
1021 Earl N, Lun X, Senger DL, Robbins SM, Staeheli P, Forsyth PA, Alain T, LaCasse EC,

- 1022 Korneluk RG. 2017. Smac mimetics synergize with immune checkpoint inhibitors to  
1023 promote tumour immunity against glioblastoma. *Nat Commun* 8.  
1024 109. Li L, Wan T, Wan M, Liu B, Cheng R, Zhang R. 2015. The effect of the size of  
1025 fluorescent dextran on its endocytic pathway. *Cell Biol Int* 39:531-9.  
1026 110. Schindelin J, Arganda-Carreras I, Frise E, Kaynig V, Longair M, Pietzsch T, Preibisch S,  
1027 Rueden C, Saalfeld S, Schmid B, Tinevez JY, White DJ, Hartenstein V, Eliceiri K,  
1028 Tomancak P, Cardona A. 2012. Fiji: an open-source platform for biological-image  
1029 analysis. *Nat Methods* 9:676-82.  
1030

### 1031 **Figure Legends**

1032 **Fig. 1. VSV $\Delta$ G-BHLD pseudotype narrow cellular tropism is not due to differences in**  
1033 **relative glycoprotein ratios or receptor expression levels.** HSV-1 (A) and VSV $\Delta$ G-BHLD (B)  
1034 entry was assessed on nine cell lines, B78H1, C10, CHO-K1, CHO-nectin-1, CHO-HVEM,  
1035 HeLa, Vero, HaCaT, and SH-SY5Y. Cells were infected at a MOI of 1. Entry was quantitated by  
1036 flow cytometry at 6 hours post infection. C) Cell surface expression of nectin-1 (C) and HVEM  
1037 (D) was analyzed by flow cytometry. Surface levels of nectin-1 were quantitated by staining  
1038 cells with an anti-nectin-1 monoclonal antibody CK41 conjugated to phycoerythrin (PE) (green  
1039 histograms). Surface levels of HVEM were quantitated by staining cells with an anti-HVEM  
1040 polyclonal antibody R140 and a FITC-labeled secondary antibody (cyan). Blue histograms are  
1041 isotype controls. Red histograms are mock (no antibody) controls. E and F) Relative ratios of  
1042 gB:gH:gL:gD for HSV-1 and VSV $\Delta$ G-BHLD particles. HSV-1 and VSV $\Delta$ G-BHLD virions  
1043 were purified either through a continuous sucrose gradient (HSV-1) or continuous Optiprep  
1044 gradient (VSV $\Delta$ G-BHLD), pelleted, and analyzed for their glycoprotein content (gB, gH, gL,  
1045 and gD) by western blot (anti-gB pAb R68, anti-gH pAb R137, anti-gL mAb L1, and anti-gD  
1046 pAb R7). A representative western blot is shown. The amounts of gB, gH, gL, and gD in three  
1047 different virion preparations were determined by densitometry. Levels of gH, gL, and gD were  
1048 normalized to gB levels from their respective virions. A Student's T-test with Welch's correction

1049 was used to determine the significance of differences between relative amounts of gH, gL, or gD  
1050 between HSV-1 and VSV $\Delta$ G-BHLD virions (ns = not significant;  $p < 0.05 = *$ ;  $p < 0.01 = **$ ;  $p$   
1051  $< 0.001 = ***$ ).

1052

1053 **Fig. 2. HSV-1 and VSV $\Delta$ G-BHLD enter cells by endocytosis.** C10 (A and B) and CHO-  
1054 HVEM (C and D) cells were pretreated with a hypertonic solution of sucrose (0.3 M) and  
1055 infected with HSV-1 and VSV $\Delta$ G-BHLD at MOI = 1. Infectivity was quantitated by flow  
1056 cytometry at 6 hours post infection. Significance was calculated using a two-tailed Student's T-  
1057 test with Welch's correction ( $p < 0.05 = *$ ;  $p < 0.01 = **$ ;  $p < 0.001 = ***$ ).

1058

1059 **Fig. 3. Both HSV-1 and VSV $\Delta$ G-BHLD require dynamin but only HSV-1 requires clathrin**  
1060 **for entry .** C10 (A and C) and CHO-HVEM (B and D) cells were pretreated with dynamin  
1061 inhibitors Dynasore (80  $\mu$ M), Dyngo-4a (25  $\mu$ M), MiTMAB (5  $\mu$ M), or the CME inhibitor,  
1062 Pitstop-2 (30  $\mu$ M) and infected with HSV-1 or VSV $\Delta$ G-BHLD at MOI = 1. Infectivity was  
1063 quantitated by flow cytometry at 6 hours post infection. CHO-HVEM cells treated with Dyngo-  
1064 4a or MiTMAB used the same DMSO control, as indicated by the same bar graph appearing  
1065 twice each in panels C and D. Significance was calculated using a two-tailed Student's T-test  
1066 with Welch's correction ( $p < 0.05 = *$ ;  $p < 0.01 = **$ ;  $p < 0.001 = ***$ ).

1067

1068 **Fig. 4. HSV-1 and VSV $\Delta$ G-BHLD entry requires cellular cholesterol but not caveolin-1.**  
1069 C10 (A and B) and CHO-HVEM (C and D) cells were pretreated with a cholesterol-removal  
1070 drug methyl- $\beta$ -cyclodextran, M $\beta$ CD (5 mM) and infected with HSV-1 (A and C) or VSV $\Delta$ G-  
1071 BHLD (B and D) at MOI = 1. Infectivity was quantitated by flow cytometry at 6 hours post

1072 infection. E) CHO-HVEM cells were transfected with a caveolin-1 siRNA (cav-1) or a  
1073 scrambled control siRNA (scr) (both 50 pm) and infected with HSV-1 or VSVΔG-BHLD at  
1074 MOI = 1. Infectivity was quantitated by flow cytometry at 6 hours post infection. Significance  
1075 was calculated using a two-tailed Student's T-test with Welch's correction ( $p < 0.05 = *$ ;  $p <$   
1076  $0.01 = **$ ;  $p < 0.001 = ***$ ). F) Western blot analyses, using antibody clone 4H312 (Santa Cruz  
1077 Biotechnology), of caveolin-1 knockdown in CHO-HVEM cells (representative of three western  
1078 blots, one from each biological replicate). G) Western blot analyses, using antibody clone 4H312  
1079 (Santa Cruz Biotechnology), of caveolin-1 levels in C10, CHO-HVEM, and 3T12 cells.

1080

1081 **Fig. 5. Neither HSV-1 nor VSVΔG-BHLD entry requires macropinocytosis.** C10 (A and B)  
1082 and CHO-HVEM (C and D) cells were pretreated with macropinocytosis inhibitors cytochalasin  
1083 D (2 μM), EIPA (25 μM), or NSC23766 (200 μM) and infected with HSV-1 or VSVΔG-BHLD  
1084 at MOI = 1. Infectivity was quantitated by flow cytometry at 6 hours post infection. Significance  
1085 was calculated using a two-tailed Student's T-test with Welch's correction (ns = not significant;  
1086  $p < 0.05 = *$ ;  $p < 0.01 = **$ ;  $p < 0.001 = ***$ ).

1087

1088 **Fig 6: Roles of Rabs 5 and 7 and Arf6 in HSV-1 and VSVΔG-BHLD entry.** The roles of the  
1089 small GTPases Rab5, Rab7 (A, C, E, G), and Arf6 (B, D, F, H) were assessed for HSV-1 (A, B,  
1090 E, F) and VSVΔG-BHLD (C, D, G, H) entry into C10 (A, B, C, D) and CHO-HVEM (E, F, G,  
1091 H) cells. C10 (A and C) and CHO-HVEM (E and G) cells were transfected with either an empty  
1092 vector control (eGFP or mCherry), eGFP or mCherry-tagged Rab5 dominant negative (DN), or  
1093 eGFP or mCherry-tagged Rab7DN. Cells were infected at an MOI = 1 with either HSV-1 or  
1094 VSVΔG-BHLD. Entry was assessed by flow cytometry at 6 hpi. The percent of infected cells



1095 was determined by dividing the number of virus(+)eGFP/mCherry(+) cells by the total number  
1096 of eGFP/mCherry(+) cells. C10 (B and D) and CHO-HVEM cells (F and H) were treated with  
1097 the Arf6 inhibitor NAV-2729 (25  $\mu$ M) and infected with either HSV-1 or VSV $\Delta$ G-BHLD at an  
1098 MOI = 1. Significance was calculated using a two-tailed Student's T-test with Welch's  
1099 correction (ns = not significant;  $p < 0.05 = *$ ;  $p < 0.01 = **$ ;  $p < 0.001 = ***$ ).

1100

1101 **Fig. 7. VSV $\Delta$ G-BHLD entry requires endosomal acidification in a cell-dependent manner.**

1102 C10 (A and B) and CHO-HVEM (C and D) cells were pretreated with inhibitors of endosomal  
1103 acidification BFLA (100 nM),  $\text{NH}_4\text{Cl}$  (50 mM), or monensin (15  $\mu$ M) and infected with HSV-1  
1104 or VSV $\Delta$ G-BHLD at MOI = 1. Infectivity was quantitated by flow cytometry at 6 hours post  
1105 infection. Significance was calculated using a two-tailed Student's T-test with Welch's  
1106 correction ( $p < 0.05 = *$ ;  $p < 0.01 = **$ ;  $p < 0.001 = ***$ ).

1107

1108 **Fig. 8. gC increases entry efficiency into CHO-HVEM and HaCaT cells.** A) Incorporation of

1109 gC was verified by western blot of pelleted and washed virions. B) VSV $\Delta$ G-BHLD-pCAGGS  
1110 and VSV $\Delta$ G-BHLD-C entry was assessed on nine cell lines, B78H1, C10, CHO-K1, CHO-  
1111 nectin-1, CHO-HVEM, HeLa, Vero, HaCaT, and SH-SY5Y. Cells were infected at a MOI of 1.  
1112 Entry was quantitated by flow cytometry at 6 hours post infection. Significance was calculated  
1113 using a two-tailed Student's T-test with Welch's correction ( $p < 0.05 = *$ ;  $p < 0.01 = **$ ;  $p <$   
1114  $0.001 = ***$ ).

1115

1116 **Fig. 9. Entry model of VSV $\Delta$ G-BHLD and HSV-1.** A) Entry of VSV $\Delta$ G-BHLD and HSV-1

1117 entry into C10 and CHO-HVEM cells occurs by endocytosis and requires dynamin and

1118 cholesterol. VSVΔG-BHLD entry into C10 and CHO-HVEM cells additionally requires NHE  
1119 and Rac1 activity whereas HSV-1 does not. VSVΔG-BHLD entry into C10 cells, but not CHO-  
1120 HVEM cells also requires Rab5 and endosomal acidification. HSV-1 does not require either  
1121 Rab5 or endosomal acidification for entry into either cell type. B) Table summarizing the cellular  
1122 molecules important for HSV-1 and VSVΔG-BHLD entry into C10 and CHO-HVEM cells.  
1123 Green check marks indicate that the virus requires that cellular component for entry. Red X-  
1124 marks indicate that the virus does not require that cellular component for entry.

1125

### 1126 **Supplemental Figure Legends**

1127 **Fig. S1. Infecting cells with VSVΔG-BHLD at a higher MOI does not increase entry to an**

1128 **appreciable extent. A) Receptor null (B78H1 and CHO-K1) and receptor bearing cells (C10,**

1129 **CHO-HVEM, HeLa, Vero, HaCaT, and SH-SY5Y) were infected at MOI =1 (red) or MOI = 10**

1130 **(purple). Entry efficiency was assessed by flow cytometry at 6 hours post infection. B and C)**

1131 **Receptor null (B78H1 and CHO-K1) and receptor bearing cells (C10, CHO-HVEM, HeLa, Vero,**

1132 **HaCaT, and SH-SY5Y) were infected at MOI =1 with either VSVΔG-G (B) or VSVΔG-PIV5**

1133 **(C). Entry was assessed by flow cytometry at 6 hours post infection.**

1134

1135 **Fig. S2. VSVΔG-G and VSVΔG-PIV5 entry in the presence of hypertonic sucrose. C10 (A,**

1136 **B) and CHO-HVEM (C, D) cells were pretreated with a hypertonic solution of sucrose (0.3 M)**

1137 **and infected with VSVΔG-G or VSVΔG-PIV5 at MOI = 1. Infectivity was quantitated by flow**

1138 **cytometry at 6 hours post infection. Significance was calculated using a two-tailed Student's T-**

1139 **test with Welch's correction (p < 0.05 = \*; p < 0.01 = \*\*; p < 0.001 = \*\*\*). E) C10 and CHO-**

1140 **HVEM cells were pretreated with 0.3 M sucrose and incubated with 50 ug/ml of AF488-labeled**



1141 transferrin (Tf). Cells were fixed, counterstained with DAPI, and imaged by confocal  
1142 microscopy. Scale bar = 25  $\mu$ m.

1143

1144 **Fig. S3 VSV $\Delta$ G-G and VSV $\Delta$ G-PIV5 differ in their dependence on dynamin and clathrin**  
1145 **for entry. C10 (A and C) and CHO-HVEM (B and D) cells were pretreated with dynamin**  
1146 **inhibitors Dynasore (80  $\mu$ M), Dyngo-4a (25  $\mu$ M), MiTMAB (5  $\mu$ M), or the CME inhibitor**  
1147 **Pitstop-2 (30  $\mu$ M) and infected with VSV $\Delta$ G-G or VSV $\Delta$ G-PIV5 at a MOI of 1. Infectivity was**  
1148 **quantitated by flow cytometry at 6 hours post infection. CHO-HVEM cells treated with Dyngo-**  
1149 **4a or MiTMAB used the same DMSO control as indicated by the same bar graph appearing**  
1150 **twice each in panels C and D. Significance was calculated using a two-tailed Student's T-test**  
1151 **with Welch's correction ( $p < 0.05 = *$ ;  $p < 0.01 = **$ ;  $p < 0.001 = ***$ ). E and F) C10 and CHO-**  
1152 **HVEM cells were pretreated with dynamin inhibitors Dynasore, Dyngo-4a, MiTMAB, or**  
1153 **Pitstop-2 at the same concentrations as in panels A-D and then incubated with 50  $\mu$ g/ml of**  
1154 **AF488-labeled transferrin. Cells were fixed, counterstained with DAPI, and imaged by confocal**  
1155 **microscopy. Scale bar = 25  $\mu$ m.**

1156

1157 **Fig. S4. VSV $\Delta$ G-G entry does not require cholesterol whereas VSV $\Delta$ G-PIV5 entry**  
1158 **requires cholesterol in a cell-type-dependent manner. C10 (A and B) and CHO-HVEM (C**  
1159 **and D) cells were pretreated with a cholesterol-removal drug methyl- $\beta$ -cyclodextran, M $\beta$ CD (5**  
1160 **mM) and infected with VSV $\Delta$ G-G or VSV $\Delta$ G-PIV5 at a MOI of 1. Infectivity was quantitated**  
1161 **by flow cytometry at 6 hours post infection. E) C10 and CHO-HVEM cells were treated with**  
1162 **either a solvent control (H<sub>2</sub>O/EtOH) or methyl- $\beta$ -cyclodextrin (M $\beta$ CD), then incubated with**  
1163 **cholera toxin subunit B labelled with Alexa Fluor 488. Confocal microscopy was performed on**

1164 the solvent control and methyl- $\beta$ -cyclodextrin treated cells. Cells were fixed, counterstained with  
1165 DAPI, and imaged by confocal microscopy. Scale bar = 25  $\mu$ m. (F) CHO-HVEM cells were  
1166 transfected with a caveolin-1 siRNA (cav-1) or a scrambled control siRNA (scr) (both 50 pm)  
1167 and infected with VSV $\Delta$ G-G or VSV $\Delta$ G-PIV5 at a MOI of 1. Infectivity was quantitated by  
1168 flow cytometry at 6 hours post infection. Significance was calculated using a two-tailed  
1169 Student's T-test with Welch's correction ( $p < 0.05 = *$ ;  $p < 0.01 = **$ ;  $p < 0.001 = ***$ ).

1170

1171 **Fig. S5. VSV $\Delta$ G-BHLD does not co-localize with the fluid-phase marker 70 kDa dextran in**  
1172 **C10 cells.** C10 cells were incubated with 1 mg/ml of rhodamine-B labelled 70 kDa dextran and  
1173 VSV $\Delta$ G-BHLD (MOI = 1) for one hour at 4° C. Cells were then shifted to 37° C for 20 minutes.  
1174 Cells were fixed, counterstained with DAPI, and imaged by confocal microscopy. gB was  
1175 detected by immunofluorescence using the rabbit pAb R68 and anti-rabbit IgG conjugated to  
1176 FITC. Green = gB (marker for VSV $\Delta$ G-BHLD particles); Red = 70 kDa dextran. Scale bar = 25  
1177  $\mu$ m.

1178

1179 **Fig. S6. VSV $\Delta$ G-BHLD, in large, does not co-localized with the fluid-phase marker, 70 kDa**  
1180 **dextran, in CHO-HVEM cells.** CHO-HVEM cells were incubated with 1 mg/ml of rhodamine-  
1181 B labelled 70 kDa dextran and VSV $\Delta$ G-BHLD (MOI = 1) for one hour at 4°C. Cells were then  
1182 shifted to 37° C for 20 minutes. Cells were fixed, counterstained with DAPI, and imaged by  
1183 confocal microscopy. gB was detected by immunofluorescence using the rabbit pAb R68 and  
1184 anti-rabbit IgG conjugated to FITC. Green = gB (marker for VSV $\Delta$ G-BHLD particles); Red = 70  
1185 kDa dextran. Scale bar = 25  $\mu$ m.

1186

1187 **Fig. S7. VSVΔG-G and VSVΔG-PIV5 entry does not require macropinocytosis.** C10 (A and  
1188 B) and CHO-HVEM (C and D) cells were pretreated with macropinocytosis inhibitors  
1189 cytochalasin D (2 μM), EIPA (25 μM), or NSC23766 (200 μM) and infected with VSVΔG-G or  
1190 VSVΔG-PIV5 at a MOI of 1. Infectivity was quantitated by flow cytometry at 6 hours post  
1191 infection. Significance was calculated using a two-tailed Student's T-test with Welch's  
1192 correction ( $p < 0.05 = *$ ;  $p < 0.01 = **$ ;  $p < 0.001 = ***$ ). E) C10 and CHO-HVEM cells were  
1193 pretreated with macropinocytosis inhibitors cytochalasin D, EIPA, or NSC23766 at the same  
1194 concentrations as in panels A-D and then incubated with 1.0 mg/ml of Rhodamine-B-labeled 70-  
1195 kDa dextran (Dex). Cells were fixed, counterstained with DAPI, and imaged by confocal  
1196 microscopy. Scale bar = 25 μm.

1197  
1198 **Fig. S8: Roles of Rab5, Rab7, and Arf6 in VSVΔG-G and VSVΔG-PIV5 entry.** The roles of  
1199 the small GTPases Rab5, Rab7 (A, C, E, G), and Arf6 (B, D, F, H) were assessed for VSVΔG-G  
1200 (A, B, E, F) and VSVΔG-PIV5 (C, D, G, H) entry into C10 (A, B, C, D) and CHO-HVEM (E, F,  
1201 G, H) cells. C10 (A and C) and CHO-HVEM (E and G) cells were transfected with either an  
1202 empty vector control (eGFP or mCherry), eGFP or mCherry-tagged Rab5 dominant negative  
1203 (DN), or eGFP or mCherry-tagged Rab7DN. Cells were infected at an MOI = 1 with either  
1204 VSVΔG-G or VSVΔG-PIV5. Entry was assessed by flow cytometry at 6 hpi. The percent of  
1205 infected cells was determined by dividing the number of virus(+)/eGFP/mCherry(+) cells by the  
1206 total number of eGFP/mCherry(+) cells. C10 (B and D) and CHO-HVEM cells (F and H) were  
1207 treated with the Arf6 inhibitor NAV-2729 (25 μM) and infected with either VSVΔG-G or  
1208 VSVΔG-PIV5 at an MOI = 1. Significance was calculated using a two-tailed Student's T-test  
1209 with Welch's correction (ns = not significant;  $p < 0.05 = *$ ;  $p < 0.01 = **$ ;  $p < 0.001 = ***$ ).

1210

1211 **Fig. S9. VSVΔG-G but not VSVΔG-PIV5 entry requires endosomal acidification.** C10 (A  
1212 and B) and CHO-HVEM (C and D) cells were pretreated with inhibitors of endosomal  
1213 acidification BFLA (100 nM), NH<sub>4</sub>Cl (50 mM), or monensin (15 μM) and infected with  
1214 VSVΔG-G or VSVΔG-PIV5 at MOI = 1. Infectivity was quantitated by flow cytometry at 6  
1215 hours post infection. Significance was calculated using a two-tailed Student's T-test with  
1216 Welch's correction (p < 0.05 = \*; p < 0.01 = \*\*; p < 0.001 = \*\*\*). E) C10 and CHO-HVEM  
1217 cells were pretreated with inhibitors of endosomal acidification at the same concentrations as in  
1218 panels A-D (BFLA, NH<sub>4</sub>Cl, or monensin) and then incubated with LysoTracker (1 μM). Cells  
1219 were fixed, counterstained with DAPI, and imaged by confocal microscopy. Scale bar = 25 μm.

1220

1221 **Table S1. Sensitivity of HSV-1, VSVΔG-BHLD, VSVΔG-G, and VSVΔG-PIV5 to specific**  
1222 **inhibitors.** Green check marks indicate that virus entry is sensitive to that particular inhibitor.  
1223 Red X marks indicate that the virus is not sensitive to that particular inhibitor.

1224

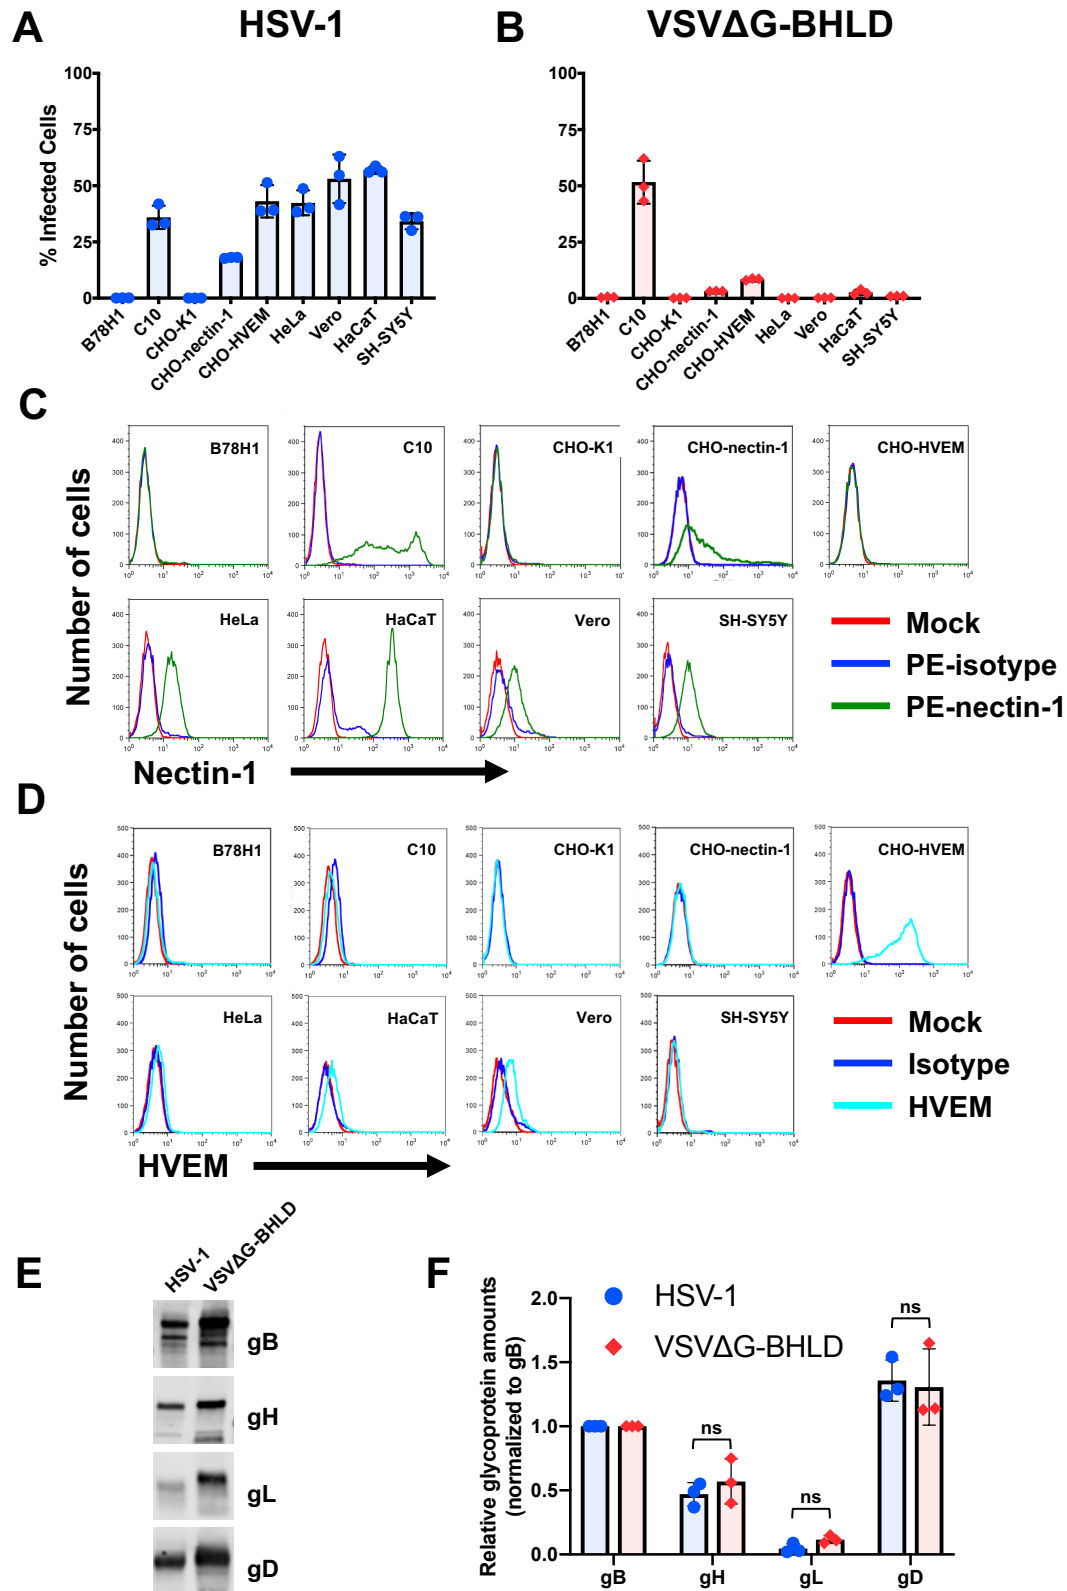

**Fig. 1. VSV $\Delta$ G-BHLD pseudotype narrow cellular tropism is not due to differences in relative glycoprotein ratios or receptor expression levels.** HSV-1 (A) and VSV $\Delta$ G-BHLD (B) entry was assessed on nine cell lines, B78H1, C10, CHO-K1, CHO-nectin-1, CHO-HVEM, HeLa, Vero, HaCaT, and SH-SY5Y. Cells were infected at a MOI of 1. Entry was quantitated by flow cytometry at 6 hours post infection. C) Cell surface expression of nectin-1 (C) and HVEM (D) was analyzed by flow cytometry. Surface levels of nectin-1 were quantitated by staining cells with an anti-nectin-1 monoclonal antibody CK41 conjugated to phycoerythrin (PE) (green histograms). Surface levels of HVEM were quantitated by staining cells with an anti-HVEM polyclonal antibody R140 and a FITC-labeled secondary antibody (cyan). Blue histograms are isotype controls. Red histograms are mock (no antibody) controls. E&F) Relative ratios of gB:gH:gL:gD for HSV-1 and VSV $\Delta$ G-BHLD particles. HSV-1 and VSV $\Delta$ G-BHLD virions were purified either through a continuous sucrose gradient (HSV-1) or continuous Optiprep gradient (VSV $\Delta$ G-BHLD), pelleted, and analyzed for their glycoprotein content (gB, gH, gL, and gD) by Western blot (anti-gB pAb R68, anti-gH pAb = R137, anti-gL mAb L1, and anti-gD pAb R7). A representative Western blot is shown. The amounts of gB, gH, gL, and gD in three different virion preparations were determined by densitometry. Levels of gH, gL, and gD were normalized to gB levels from their respective virions. A Student's T-test with Welch's correction was used to determine the significance of differences between relative amounts of gH, gL, or gD between HSV-1 and VSV $\Delta$ G-BHLD virions (ns = not significant;  $p < 0.05 = *$ ;  $p < 0.01 = **$ ;  $p < 0.001 = ***$ ).

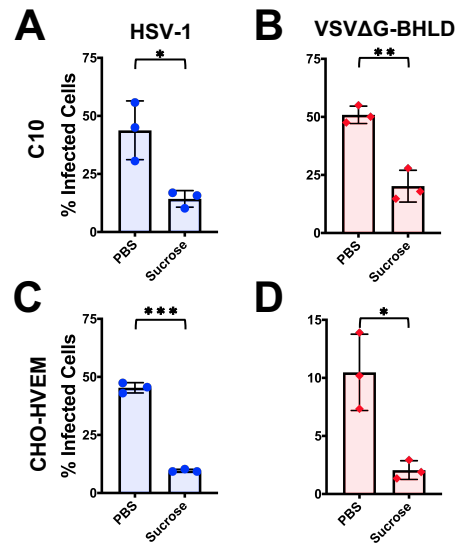

**Fig. 2. HSV-1 and VSVΔG-BHLD enter cells by endocytosis.** C10 (A and B) and CHO-HVEM (C and D) cells were pretreated with a hypertonic solution of sucrose (0.3 M) and infected with HSV-1 and VSVΔG-BHLD at MOI = 1. Infectivity was quantitated by flow cytometry at 6 hours post infection. Significance was calculated using a two-tailed Student's T-test with Welch's correction ( $p < 0.05 = *$ ;  $p < 0.01 = **$ ;  $p < 0.001 = ***$ ).

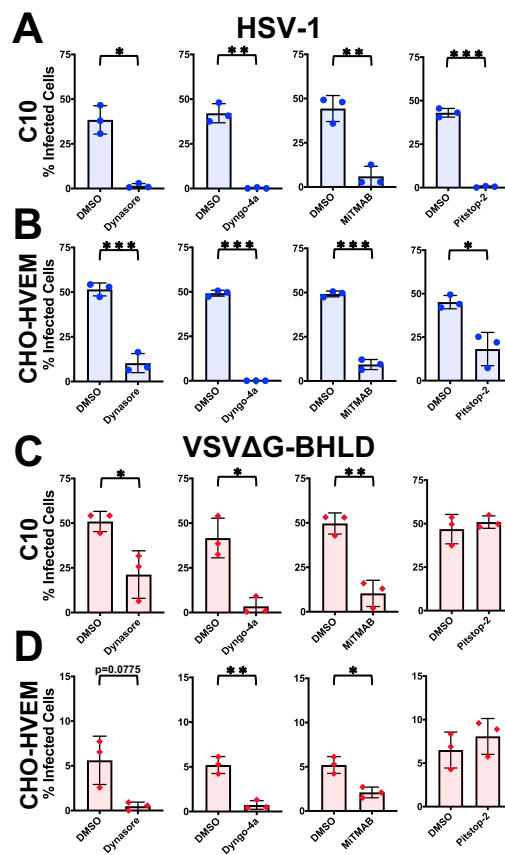

**Fig. 3. Both HSV-1 and VSVΔG-BHLD require dynamin but only HSV-1 requires clathrin for entry .** C10 (A and C) and CHO-HVEM (B and D) cells were pretreated with dynamin inhibitors Dynasore (80 μM), Dyngo-4a (25 μM), MiTMAB (5 μM), or the CME inhibitor, Pitstop-2 (30 μM) and infected with HSV-1 or VSVΔG-BHLD at MOI = 1. Infectivity was quantitated by flow cytometry at 6 hours post infection. CHO-HVEM cells treated with Dyngo-4a or MiTMAB used the same DMSO control, as indicated by the same bar graph appearing twice each in panels C and D. Significance was calculated using a two-tailed Student's T-test with Welch's correction ( $p < 0.05 = *$ ;  $p < 0.01 = **$ ;  $p < 0.001 = ***$ ).



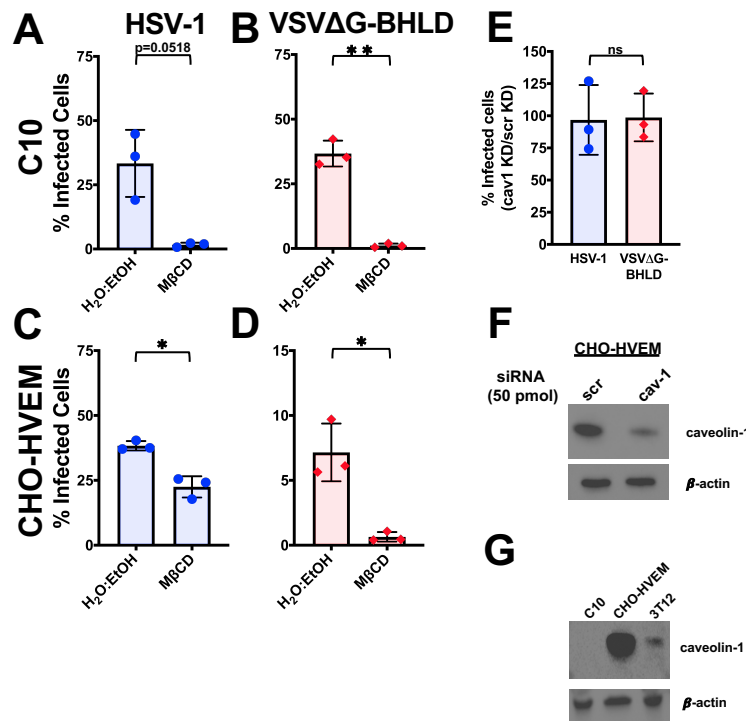

**Fig. 4. HSV-1 and VSVΔG-BHLD entry requires cellular cholesterol but not caveolin-1.** C10 (A and B) and CHO-HVEM (C and D) cells were pretreated with a cholesterol-removal drug methyl-β-cyclodextran, MβCD (5 mM) and infected with HSV-1 (A and C) or VSVΔG-BHLD (B and D) at MOI = 1. Infectivity was quantitated by flow cytometry at 6 hours post infection. E) CHO-HVEM cells were transfected with a caveolin-1 siRNA (cav-1) or a scrambled control siRNA (scr) (both 50 pm) and infected with HSV-1 or VSVΔG-BHLD at MOI = 1. Infectivity was quantitated by flow cytometry at 6 hours post infection. Significance was calculated using a two-tailed Student's T-test with Welch's correction ( $p < 0.05 = *$ ;  $p < 0.01 = **$ ;  $p < 0.001 = ***$ ). F) Western blot analyses, using antibody clone 4H312 (Santa Cruz Biotechnology), of caveolin-1 knockdown in CHO-HVEM cells (representative of three western blots, one from each biological replicate). G) Western blot analyses, using antibody clone 4H312 (Santa Cruz Biotechnology), of caveolin-1 levels in C10, CHO-HVEM, and 3T12 cells.

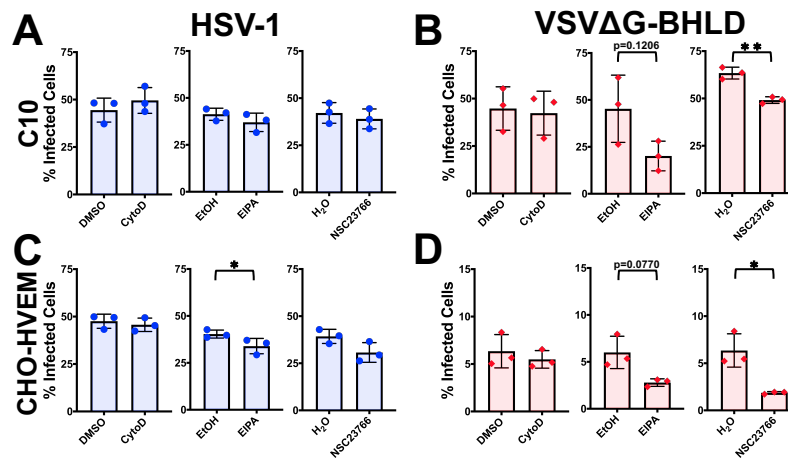

**Fig. 5. Neither HSV-1 nor VSVΔG-BHLD entry requires macropinocytosis.** C10 (A and B) and CHO-HVEM (C and D) cells were pretreated with macropinocytosis inhibitors cytochalasin D (2 μM), EIPA (25 μM), or NSC23766 (200 μM) and infected with HSV-1 or VSVΔG-BHLD at MOI = 1. Infectivity was quantitated by flow cytometry at 6 hours post infection. Significance was calculated using a two-tailed Student's T-test with Welch's correction (ns = not significant;  $p < 0.05 = *$ ;  $p < 0.01 = **$ ;  $p < 0.001 = ***$ ).

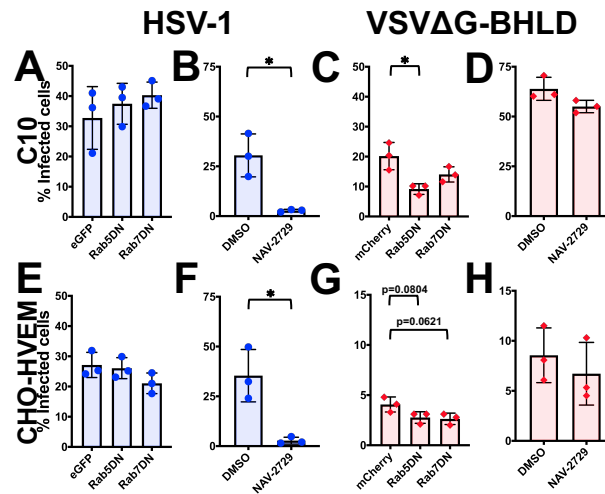

**Fig 6: Roles of Rabs 5 and 7 and Arf6 in HSV-1 and VSVΔG-BHLD entry.** The roles of the small GTPases Rab5, Rab7 (A, C, E, G), and Arf6 (B, D, F, H) were assessed for HSV-1 (A, B, E, F) and VSVΔG-BHLD (C, D, G, H) entry into C10 (A, B, C, D) and CHO-HVEM (E, F, G, H) cells. C10 (A and C) and CHO-HVEM (E and G) cells were transfected with either an empty vector control (eGFP or mCherry), eGFP or mCherry-tagged Rab5 dominant negative (DN), or eGFP or mCherry-tagged Rab7DN. Cells were infected at an MOI = 1 with either HSV-1 or VSVΔG-BHLD. Entry was assessed by flow cytometry at 6 hpi. The percent of infected cells was determined by dividing the number of virus(+)eGFP/mCherry(+) cells by the total number of eGFP/mCherry(+) cells. C10 (B and D) and CHO-HVEM cells (F and H) were treated with the Arf6 inhibitor NAV-2729 (25 μM) and infected with either HSV-1 or VSVΔG-BHLD at an MOI = 1. Significance was calculated using a two-tailed Student's T-test with Welch's correction (ns = not significant;  $p < 0.05 = *$ ;  $p < 0.01 = **$ ;  $p < 0.001 = ***$ ).

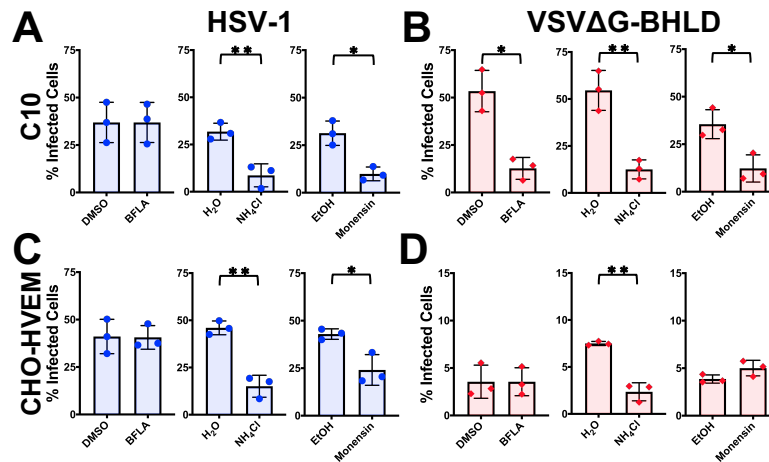

**Fig. 7. VSVΔG-BHLD entry requires endosomal acidification in a cell-dependent manner.** C10 (A and B) and CHO-HVEM (C and D) cells were pretreated with inhibitors of endosomal acidification BFLA (100 nM), NH<sub>4</sub>Cl (50 mM), or monensin (15 μM) and infected with HSV-1 or VSVΔG-BHLD at MOI = 1. Infectivity was quantitated by flow cytometry at 6 hours post infection. Significance was calculated using a two-tailed Student's T-test with Welch's correction (p < 0.05 = \*; p < 0.01 = \*\*; p < 0.001 = \*\*\*).

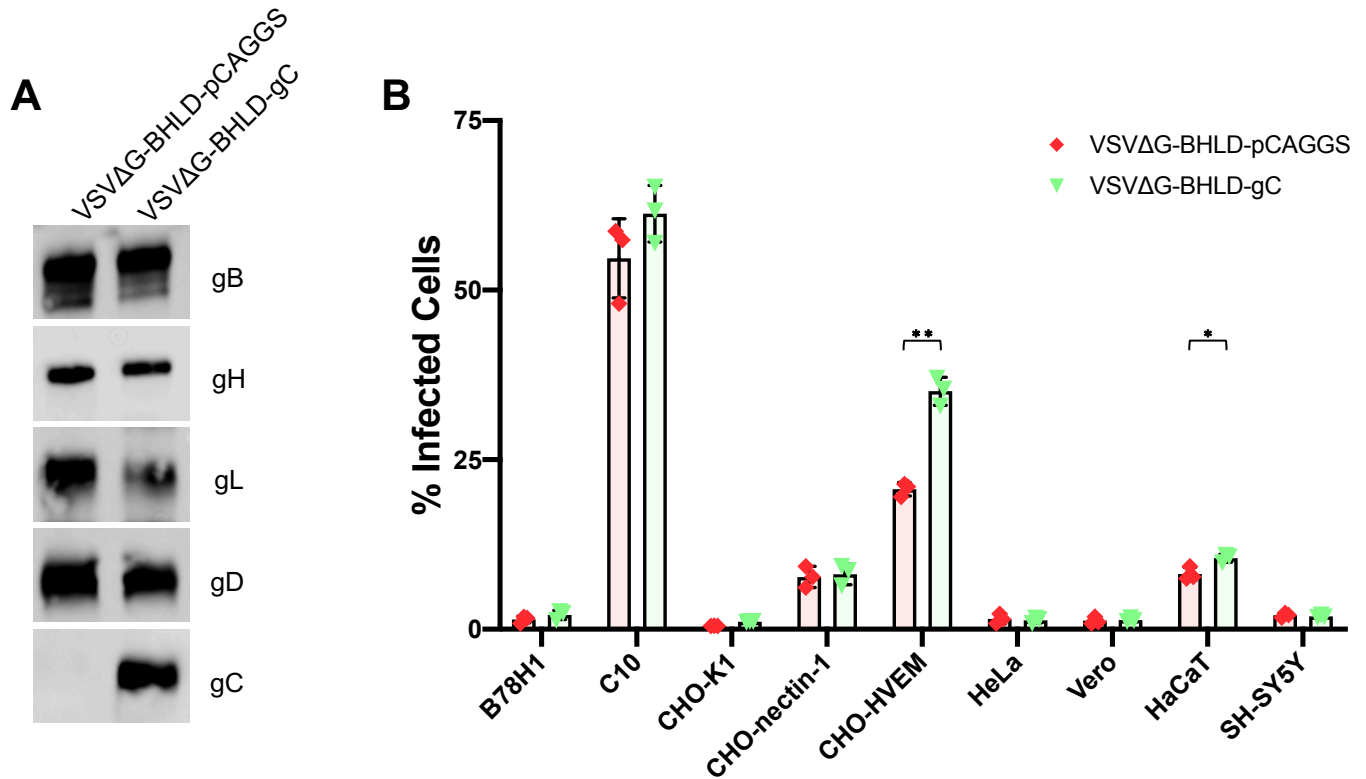

**Fig. 8. gC increases entry efficiency into CHO-HVEM and HaCaT cells.** A) Incorporation of gC was verified by western blot of pelleted and washed virions. B) VSVΔG-BHLD-pCAGGS and VSVΔG-BHLD-gC entry was assessed on nine cell lines, B78H1, C10, CHO-K1, CHO-nectin-1, CHO-HVEM, HeLa, Vero, HaCaT, and SH-SY5Y. Cells were infected at a MOI of 1. Entry was quantitated by flow cytometry at 6 hours post infection. Significance was calculated using a two-tailed Student's T-test with Welch's correction ( $p < 0.05 = *$ ;  $p < 0.01 = **$ ;  $p < 0.001 = ***$ ).

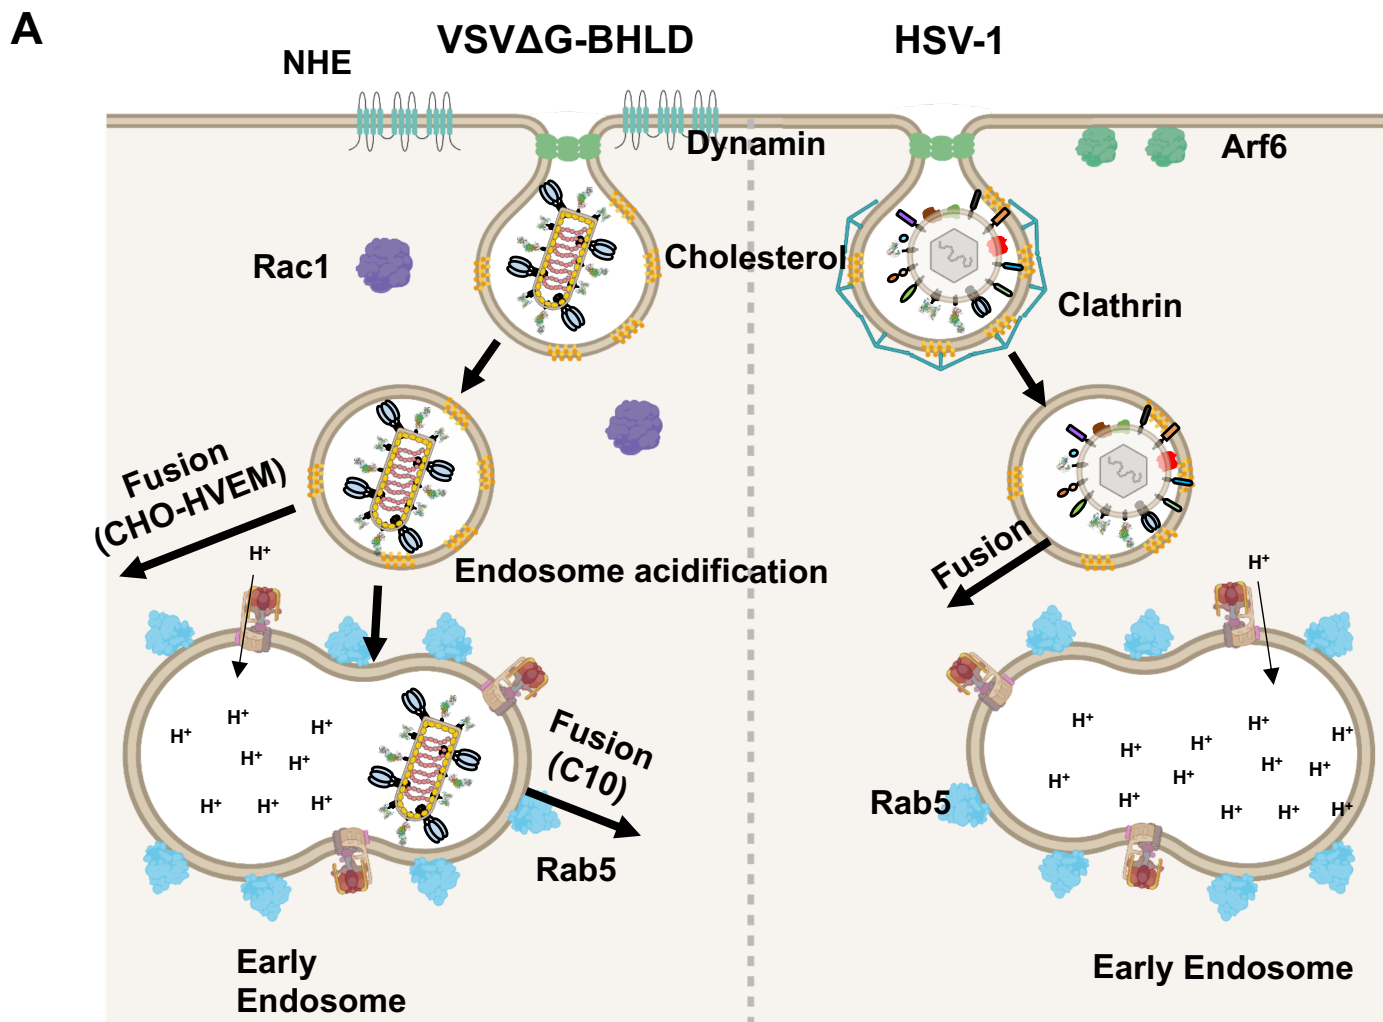

**B**

|          |            | Endocytosis | Dynamin | Clathrin | Cholesterol | Caveolin | Macropino-cytosis | Small GTPases      | Low pH |
|----------|------------|-------------|---------|----------|-------------|----------|-------------------|--------------------|--------|
| C10      | HSV-1      | ✓           | ✓       | ✓        | ✓           | X        | X                 | Arf6 ✓<br>Rab5/7 X | X      |
|          | VSVΔG-BHLD | ✓           | ✓       | X        | ✓           | X        | X                 | Arf6 X<br>Rab5/7 ✓ | ✓      |
| CHO-HVEM | HSV-1      | ✓           | ✓       | ✓        | ✓           | X        | X                 | Arf6 ✓<br>Rab5/7 X | X      |
|          | VSVΔG-BHLD | ✓           | ✓       | X        | ✓           | X        | X                 | Arf6 X<br>Rab5/7 X | X      |

**Fig. 9. Entry model of VSVΔG-BHLD and HSV-1.** A) Entry of VSVΔG-BHLD and HSV-1 entry into C10 and CHO-HVEM cells occurs by endocytosis and requires dynamin and cholesterol. VSVΔG-BHLD entry into C10 and CHO-HVEM cells additionally requires NHE and Rac1 activity whereas HSV-1 does not. VSVΔG-BHLD entry into C10 cells, but not CHO-HVEM cells also requires Rab5 and endosomal acidification. HSV-1 does not require either Rab5 or endosomal acidification for entry into either cell type. B) Table summarizing the cellular molecules important for HSV-1 and VSVΔG-BHLD entry into C10 and CHO-HVEM cells. Green check marks indicate that the virus requires that cellular component for entry. Red X marks indicate that the virus does not
